# Supplementary material for: Immune cell landscape analysis reveals prognostic immune cells and its potential mechanism in squamous cell lung carcinoma
Source: PeerJ. 2020 Oct 5;8:e9996. doi: 10.7717/peerj.9996 (PMC7543728; doi:10.7717/peerj.9996)
Supplement: Supplemental Information 2 [file peerj-08-9996-s002.xlsx]

## Sheet: Sheet 1
Supplentary Table S1. The immune cell infitration abundance estimated by CIBERSORT and clinical information of each patient.
TCGA.Participant.Barcode	B.Cells.Memory	B.Cells.Naive	Dendritic.Cells.Activated	Dendritic.Cells.Resting	Eosinophils	Macrophages.M0	Macrophages.M1	Macrophages.M2	Mast.Cells.Activated	Mast.Cells.Resting	Monocytes	Neutrophils	NK.Cells.Activated	NK.Cells.Resting	Plasma.Cells	T.Cells.CD4.Memory.Activated	T.Cells.CD4.Memory.Resting	T.Cells.CD4.Naive	T.Cells.CD8	T.Cells.Follicular.Helper	T.Cells.gamma.delta	T.Cells.Regulatory.Tregs	age	gender	stage	T_pathologic	N_pathologic	M_pathologic	stage_r	smokinghistory
TCGA-18-3419	0	0.0366859	0	0.00490722	0	0.0630307	0.0939004	0.160093	0.0453124	0	0.0135993	0.0498839	0.00643454	0.0280217	0.0746955	0.0161888	0.135732	0	0.177646	0.0682202	0	0.0256477	73	MALE	Stage IIB	T2	N1	M0	II	4
TCGA-21-5783	0	0.198947	0	0	0	0.274599	0.0370452	0.178635	0.0143585	0	0	0.000827874	0	0	0.138459	0	0.0703947	0	0.0530343	0.0333192	0	0.00038127	76	MALE	Stage IB	T2	N0	M0	I	3
TCGA-22-4604	0	0.0679312	0	0.0148788	0	0.141506	0.0952252	0.29245	0.0620803	0	0	0	0	0.023714	0.0623032	0.00587409	0.0890315	0	0.0596322	0.0591017	0	0.0262725	73	MALE	Stage IIA	T2a	N1	M0	II	2
TCGA-22-5478	0.0948294	0.0241118	0	0.00493603	0	0.231699	0.0503961	0.301963	0	0.0226925	0.0248649	0	0.00773758	0.00479636	0.0364969	0	0.0780641	0	0.0669068	0.0403087	0	0.010197	79	MALE	Stage IB	T2a	N0	M0	I	4
TCGA-22-5485	0.0441267	0	0.0112393	0.079995	0	0.0237906	0.0108152	0.490922	0	0.133451	0.0635188	0	0.0207545	0	0	0	0.00651536	0	0.0819486	0.0329231	0	0	58	FEMALE	Stage IA	T1a	N0	M0	I	2
TCGA-22-5489	0	0.0515382	0	0	0	0.0656383	0.0802849	0.268245	0	0.0222899	0.0163553	0.00473921	0.0417718	0	0.153598	0	0.105638	0	0.097401	0.0383212	0	0.0541793	64	MALE	Stage IA	T1b	N0	M0	I	4
TCGA-22-5492	0	0.0735718	0.00588466	0.0444421	0	0	0.0526701	0.266911	0	0.0420831	0	0.0210788	0.0675764	0	0.0484194	0.000973897	0.197544	0	0.107531	0.0713136	0	0	73	FEMALE	Stage IIIA	T2a	N2	M0	III	4
TCGA-34-2596	0.0344886	0.14388	0.00889734	0	0	0.0185973	0.0346856	0.289415	0	0.0022502	0.0208233	0.0126629	0.0135249	0.00388204	0.0605221	0	0.208953	0	0.0625856	0.0848323	0	0	70	MALE	Stage IIB	T2	N1	M0	II	3
TCGA-34-5240	0.00463954	0.0280613	0	0.010563	0	0.132517	0.0329663	0.411917	0	0.0799796	0.0258088	0.00795128	0	0	0.0181183	0	0.0877469	0	0.113601	0.0461295	0	0	73	FEMALE	Stage IIB	T2	N1	M0	II	2
TCGA-34-5928	0	0.0495066	0	0	0	0.12589	0.157273	0.230521	0.0386277	0	0.0165494	0.0122724	0	0.000131588	0.00565489	0.0078612	0.214464	0	0.130308	0.0109405	0	0	83	FEMALE	Stage IIB	T2	N1	M0	II	3
TCGA-34-8456	0.00970681	0.0378541	0	0.00435473	0	0.171594	0.0275141	0.284039	0	0.0300947	0	0.00187125	0	0.0315168	0.198013	0.010369	0.0875435	0.00638668	0.0904347	0	0	0.00870833	71	FEMALE	Stage IIA	T2a	N1	M0	II	5
TCGA-34-A5IX	0	0.0414656	0	0.036994	0	0.307307	0.0734989	0.148774	0	0.00398886	0.0205957	0.0027047	0.0613443	0.00668884	0.029798	0	0.0576106	0	0.131934	0.0772956	0	0	80	MALE	Stage IIB	T3	N0	M0	II	4
TCGA-37-4141	0	0.0746098	0	0	0	0.0451438	0.0589558	0.318566	0.023511	0	0.00892626	0	0.00799467	0.000860096	0.120954	0	0.107317	0	0.15552	0.0775244	0	0.00011828	65	FEMALE	Stage IA	T1b	N0	M0	I	1
TCGA-43-2576	0.0207171	0.011641	0	0	0	0.116816	0.0638653	0.257093	0	0.0477708	0.0152496	0.00210924	0.0675748	0	0.0574425	0	0.0618313	0	0.116035	0.112177	0	0.0496771	62	FEMALE	Stage IIIA	T2	N2	M0	III	4
TCGA-43-2578	0	0.0697908	0.00503929	0	0	0	0.124643	0.325399	0	0.0636447	0.0155604	0	0.0265561	0.00266528	0.0842712	0	0.0264858	0	0.168095	0.0878495	0	0	59	FEMALE	Stage IA	T1	N0	M0	I	4
TCGA-43-6770	0	0.0310488	0	0.0197389	0	0.308792	0.00505923	0.312312	0	0.102523	0	0	0	0.0416893	0.0297928	0	0.0752997	0.00397788	0.0453689	0	0	0.024398	59	FEMALE	Stage IB	T2a	N0	MX	I	2
TCGA-56-7222	0.0184494	0.0084829	0.1598	0	0.0231561	0.185634	0	0.107544	0.336242	0	0	0.021131	0.00873654	0	0.0462471	0	0	0	0	0.0845769	0	0	60	MALE	Stage IB	T2a	N0	M0	I	2
TCGA-60-2697	0.0811676	0.0771469	0.010912	0	0	0.0260036	0.0295941	0.108665	0	0.0542981	0.0236151	0	0.015026	0	0.175923	0	0.233374	0	0.0837761	0.0655911	0	0.0149074
TCGA-60-2716	0	0.0533147	0.0507723	0.0240488	0	0.0289194	0.0212103	0.332461	0	0.0440169	0.0276924	0.0182721	0.0450405	0	0.101417	0	0.0587202	0	0.130764	0.0549007	0	0.00844981	39	MALE	Stage IIB	T2	N1	M0	II	1
TCGA-60-2724	0	0	0.0683431	0	0	0.26546	0	0.374267	0.0431032	0	0.00672141	0.0671667	0	0.0254766	0.0043553	0	0.120943	0	0.0104231	0.013741	0	0	47	MALE	Stage IIIA	T3	N1	M0	III	4
TCGA-63-7020	0	0.153958	0.0230368	0.00348632	0	0.0488313	0.0420665	0.177175	0	0.0452981	0.0178911	0.0150511	0.0751407	0	0.140894	0	0.0965374	0	0.117264	0.0417127	0	0.00165641		MALE	Stage IA	T1	N0	M0	I	4
TCGA-63-A5M9	0	0.0563645	0.00874983	0.0178505	0	0.0222478	0.103863	0.240987	0	0.12454	0.0353122	0	0.0181099	0.0141568	0.0364585	0.014836	0.0645945	0	0.125857	0.116073	0	0		FEMALE	Stage IIB	T2	N1	M0	II	4
TCGA-63-A5MJ	0	0.0289496	0.0281791	0	0	0.186393	0.0970608	0.308938	0.0250583	0	0	0	0	0.0161237	0.0756101	0.0128895	0.0756764	0	0.103489	0.0416327	0	0	54	MALE	Stage IIB	T2	N1	M0	II	2
TCGA-63-A5MN	0	0.0154728	0.0136649	0.00675094	0	0	0.0954106	0.243877	0	0.0511813	0.025065	0.0081805	0.0308927	0	0.129633	0.0142153	0.171095	0	0.151588	0.0323297	0	0.0106433	78	FEMALE	Stage IIB	T3	N0	M0	II	1
TCGA-63-A5MS	0	0.126435	0	0.00325785	0	0.0867631	0.0523636	0.327727	0	0.00878025	0	0	0	0	0.199456	0	0	0	0.107494	0.0577417	0.00778357	0.0221979	78	MALE	Stage IB	T2	N0	M0	I	3
TCGA-66-2754	0	0.0456182	0.0203354	0.00115644	0	0.0739961	0.0433814	0.406521	0.0510081	0	0.00813171	0	0.0360208	0	0.0336048	0	0.127564	0	0.0898833	0.0627794	0	0	67	MALE	Stage IIIA	T2	N2	M0	III	4
TCGA-66-2767	0.0501124	0.00781942	0	0.0262112	0	0.0705266	0.0843437	0.276478	0	0.0309546	0.00983785	0.0049301	0.032465	0.00150312	0.0258985	0	0.0598404	0	0.180592	0.0738585	0	0.0646292	62	MALE	Stage IIIB	T2	N3	M0	III	4
TCGA-70-6722	0	0.096653	0.0571979	0	0	0.0692196	0.0722695	0.347092	0.0125067	0	0	0.00710627	0.0131645	0.00854874	0.100512	0	0.140742	0	0.0619306	0	0	0.0130564	47	MALE	Stage IIIA	T3	N1	M0	III	1
TCGA-70-6723	0	0.00425031	0.000619505	0	0	0	0.118303	0.19843	0	0.0369425	0.0434393	0	0.133269	0.020951	0	0.0415017	0	0	0.357929	0.0443659	0	0	65	MALE	Stage IIA	T3	N0	M0	II	1
TCGA-77-6845	0.0127683	0.0215661	0.073193	0	0	0.0125139	0.00228708	0.411173	0.00130096	0.0267219	0.0279014	0.0160411	0	0.0571049	0.178575	0	0	0.0102092	0.0756386	0.0730049	0	0	69	MALE	Stage IIB	T3	N0	M0	II	4
TCGA-77-7337	0	0.0490602	0.0442748	0.00263839	0	0.128922	0.111607	0.218733	0.0376574	0	0.0116733	0.015157	0	0.0590393	0.0955551	0.0143487	0.107035	0	0.0870348	0.0160793	0	0.00118448	65	MALE	Stage IIB	T2	N1	M0	II	4
TCGA-77-8009	0.0533324	0	0	0.0125494	0.00132278	0.244696	0.150184	0.323138	0.0350753	0	0.00377994	0	0.00673885	0.0273012	0	0.00245008	0	0.0496864	0.0876493	0	0	0.00209604	68	MALE	Stage IIB	T2	N1	M0	II	4
TCGA-77-8133	0.0931026	0.223725	0	0.00603288	0	0.212481	0.0213663	0.101967	0.0146065	0	0	0	0	0.0288593	0	0	0.0564558	0	0.0378342	0.125632	0	0.0779376	74	MALE	Stage IIA	T1	N1	M0	II	2
TCGA-77-8136	0	0.0621359	0.000470724	0.00273389	0	0.103515	0.137676	0.157774	0.0110187	0	0.0237215	0	0	0.0657226	0.0300624	0.0659305	0.111229	0	0.171026	0.042779	0	0.0142043	74	FEMALE	Stage IIB	T2	N1	M0	II	2
TCGA-77-8140	0	0.0971204	0.025876	0.0126836	0	0.0450303	0.00114673	0.107206	0	0.0540315	0.00769387	0.0242922	0.0043989	0.02374	0.382238	0	0	0	0.141207	0.0733346	0	0	66	FEMALE	Stage IIB	T2	N1	M0	II	4
TCGA-77-8144	0.0143854	0	0	0.0105832	0	0.236022	0.107951	0.212637	0.114849	0	0	0.00164623	0.0150178	0.0118822	0.0402491	0	0.124344	0	0.0857468	0.0246853	0	0	70	MALE	Stage IB	T2	N0	M0	I	2
TCGA-77-A5G3	0	0.0865078	0.0211543	0.0147604	0	0.0392988	0.0554192	0.277822	0	0.0177063	0.00703195	0	0.0160143	0.00542192	0.0665066	0.0160667	0.146142	0	0.148988	0.0811596	0	0	63	MALE	Stage IIB	T2	N1	M0	II	4
TCGA-77-A5GF	0	0.139686	0.00600146	0	0	0.0326416	0.0828318	0.2282	0	0.0259348	0.0189534	0	0.0214666	0.0032489	0.166161	0.00362043	0.0484058	0	0.149766	0.0690394	0	0.00404324	70	MALE	Stage IIA	T2a	N1	M0	II	4
TCGA-85-8351	0	0.0651786	0.0804818	0.0229508	0	0.0624579	0.0659381	0.393081	0	0.0308984	0.0134644	0.00606313	0.0438263	0.00461525	0.0118078	0	0.0826007	0	0.0596542	0.053921	0	0.00306083	72	MALE	Stage IIA	T2a	N1	M0	II	2
TCGA-85-8354	0.0574265	0	0	0.00361078	0.000343349	0.18302	0.0403257	0.205732	0.0616681	0	0	0.00961453	0.0138347	0	0.159138	0	0	0	0.11724	0.141915	0	0.00613074	53	MALE	Stage IB	T2a	N0	M0	I	2
TCGA-85-8479	0.0526746	0	0.0365191	0	0	0.299864	0	0.205611	0.122139	0	0.0164064	0.00492886	0	0.0402007	0.0366481	0	0	0.0275022	0.0887183	0.0205322	0	0.0482547	66	MALE	Stage IA	T1a	N0	M0	I	4
TCGA-85-8481	0	0.145744	0.0171189	0	0	0.158025	0.0169518	0.228076	0.0639895	0	0	0.0141379	0.00849311	0.00414622	0.0983985	0	0.173524	0	0.0460131	0	0	0.0253816	70	MALE	Stage IIB	T3	N0	M0	II	4
TCGA-85-8664	0	0.0703201	0	0	0	0.405346	0.0317721	0.0851505	0	0.0261699	0.00175964	0	0.0623569	0	0.0829467	0	0	0	0.0920498	0.131128	0	0.0110007	73	MALE	Stage IIB	T2b	N1	M0	II	2
TCGA-85-A511	0	0.148075	0.0466261	0	0	0.100956	0.0579585	0.135302	0.0280228	0	0.036205	0	0	0.0213826	0.122469	0.0513122	0.0665126	0	0.0875929	0.0760722	0	0.0215136	62	MALE	Stage IIB	T2b	N1	M0	II	2
TCGA-90-7767	0	0.0456203	0	0.0286879	0	0.178623	0.101852	0.173106	0	0.00712988	0	0	0.0441009	0	0.00824286	0	0.174281	0	0.116058	0.0232827	0	0.0990151	56	MALE	Stage IIB	T2b	N1	MX	II	3
TCGA-90-A4ED	0	0.172414	0	0	0	0.0564638	0.0579992	0.249919	0	0.0265095	0	0	0.0197636	0.0106233	0.258837	0	0	0	0.0853221	0.0621483	0	0	69	MALE	Stage IB	T2a	N0	MX	I	3
TCGA-90-A4EE	0.0119798	0.0266842	0	0.0208382	0	0.071576	0.0987167	0.110509	0	0.0524471	0.0341058	0.00247467	0.0886148	0	0.0555617	0.0320711	0.114931	0	0.187531	0.0430661	0	0.0488926	53	MALE	Stage IIA	T2a	N1	MX	II	2
TCGA-94-A5I4	0	0.158807	0.0169392	0	0	0.22679	0.00922118	0.189065	0.0469442	0	0.00720634	0.0125783	0	0.0261262	0.150279	0	0.0546093	0	0.0280212	0.026539	0	0.0468743	61	MALE	Stage IIA	T2a	N1	MX	II	4
TCGA-96-7545	0.0369987	0.0625623	0.0144465	0.0282543	0	0.0374435	0.0315889	0.329122	0.00405439	0.0545265	0.020883	0.00920247	0	0.0166618	0	0	0.277965	0	0.076291	0	0	0	73	MALE	Stage IA	T1	N0	MX	I	4
TCGA-96-8169	0	0.160161	0.00366829	0.060216	0	0.0709848	0.0448259	0.2226	0	0.0285656	0.0192299	0.0164368	0	0	0.156315	0	0.0751688	0	0.0857006	0.0365908	0	0.019536	67	FEMALE	Stage IA	T1a	N0	M0	I	4
TCGA-98-8021	0	0.231658	0.00479854	0.0144805	0	0.0600953	0.0219127	0.249614	0.0270747	0	0	0	0	0.0130437	0.197191	0	0.00560544	0	0.102097	0.0480848	0	0.0243446	75	FEMALE	Stage IA	T1a	N0	M0	I	4
TCGA-98-A53D	0.126434	0.0602032	0.0325506	0	0	0.0206318	0.000226751	0.341598	0	0.0151585	0.046385	0.0189491	0.0102314	0.0323714	0.0171062	0	0.106491	0	0.0973055	0.058942	0	0.0154163	68	MALE	Stage IIB	T3	N0	M0	II	4
TCGA-LA-A7SW	0.0367248	0	0.0400094	0	0	0.41773	0	0.336864	0.0443076	0	0	0.0352488	0	0.0139373	0.00623814	0.00491676	0	0.0512442	0.0127795	0	0	0	71	MALE	Stage IIIA	T3	N1	MX	III	4
TCGA-MF-A522	0	0.00526017	0.0451198	0	0.00119057	0.0190734	0.0389295	0.206547	0.0604333	0	0.0356048	0	0	0.105481	0.0374145	0.0735758	0	0	0.25003	0.12134	0	0	54	MALE	Stage IB	T2a	N0	MX	I	4
TCGA-NC-A5HF	0.062306	0	0.0419707	0.0258206	0	0.121943	0	0.141	0.0377705	0.0155849	0.0238666	0	0	0.110604	0.113311	0	0	0.00984676	0.0174553	0.278521	0	0	74	MALE	Stage IIIB	T4	N0	MX	III	2
TCGA-NC-A5HM	0	0.24857	0	0	0	0.167257	0.0462585	0.103889	0	0.0124299	0	0	0.0607538	0	0.121082	0.0119672	0.137494	0	0.0502824	0.0389332	0	0.00108277	76	MALE	Stage IB	T2a	N0	M0	I	3
TCGA-NC-A5HQ	0	0.213418	0.0700628	0	0	0.00342664	0.0139894	0.133	0	0.00708561	0.00722076	0	0.0275853	0	0.144442	0	0.147236	0	0.0962007	0.136333	0	0	70	MALE	Stage IIIA	T3	N2	M0	III	2
TCGA-O2-A52N	0	0.105129	0	0.00773845	0	0.0273478	0.13684	0.261579	0	0.0291606	0.0216888	0	0.0383428	0.0218237	0.0547427	0	0.0182257	0	0.138027	0.139355	0	0	78	MALE	Stage I	T2	N0	MX	I	4
TCGA-18-3410	0	0.0724455	0	0	0	0.109005	0.102417	0.11917	0	0.0208369	0.0214363	0.00246879	0.0360077	0	0.0799681	0	0.204366	0	0.179674	0.0116466	0	0.0405582	81	MALE	Stage IIB	T3	N0	M0	II	3
TCGA-22-1016	0	0.131565	0.0411611	0	0	0.0557687	0.00228236	0.295413	0	0.0146367	0.104497	0.0553436	0.00538036	0	0.0563366	0	0.174504	0	0.0434882	0.0196226	0	0	65	MALE	Stage IB	T2	N0	M0	I	3
TCGA-22-4596	0	0.0537208	0.0173801	0.0670386	0	0.0310379	0.0580102	0.257015	0	0.0452497	0.0371299	0.000706153	0	0.0245801	0.0770447	0.0255091	0.191408	0	0.0666313	0.0422293	0	0.00530879	69	FEMALE	Stage IB	T1b	N0	M0	I	4
TCGA-22-4601	0	0.123671	0.0474814	0	0	0.014214	0.0537704	0.306165	0	0.0417786	0.0209523	0	0.0298978	0.0187248	0.129285	0	0.0214683	0	0.0775939	0.108539	0	0.00645882	73	FEMALE	Stage IIIA	T4	N0	M0	III	2
TCGA-22-5473	0	0.137417	0.0102099	0.0123218	0	0.0808973	0.0785034	0.322594	0.01743	0.00296829	0.0033503	0.00187961	0.0242175	0	0.11034	0	0.0857408	0	0.0925338	0.0121816	0	0.00741527	78	MALE	[Discrepancy]	T3	N0	M0	[Discrepancy]	3
TCGA-22-5477	0	0.0456903	0.0391688	0.000529048	0	0.00876111	0.0386554	0.346611	0	0.0180374	0.0365022	0	0.0539709	0	0.019129	0	0.119324	0	0.172938	0.100683	0	0	65	MALE	Stage IA	T1	N0	M0	I	2
TCGA-22-A5C4	0.0377469	0.00883999	0.11674	0	0	0.0176336	0.0484913	0.308055	0	0.0667271	0.0144798	0.0168272	0.0695105	0	0.0219876	0	0.0885952	0	0.0729946	0.107382	0	0.00398869	70	MALE	Stage IIA	T2b	N0	M0	II	4
TCGA-33-6738	0	0.217625	0	0	0	0.159011	0.0157776	0.142802	0	0.00978966	0.0151923	0	0	0.000906374	0.201492	0.000870458	0.100952	0	0.0515074	0.0496966	0	0.0343769	80	MALE	Stage IIIA	T1	N2	MX	III	4
TCGA-34-2600	0	0.0750637	0.0087993	0.0163407	0	0	0.047082	0.223587	0.080545	0	0.022127	0.0100935	0.0345156	0.0202604	0.0704422	0	0.161684	0	0.055533	0.173927	0	0	76	FEMALE	Stage IA	T1	N0	M0	I	4
TCGA-34-2608	0.0251756	0	0	0.0325063	0	0.0993161	0.0409283	0.391007	0	0.016732	0.0174083	0.000915304	0	0.016148	0.105023	0	0.154704	0	0.0570591	0.032822	0	0.0102542	84	MALE	Stage IB	T2	N0	M0	I	3
TCGA-34-5231	0	0.167189	0	0.0254804	0	0.0133168	0.0891858	0.144057	0	0.023471	0.0277975	0	0.0378087	0.0347164	0.10714	0	0.0753149	0	0.152812	0.0962393	0	0.0054709	72	MALE	Stage IA	T1	N0	M0	I	3
TCGA-34-5929	0	0.0347077	0.107058	0	0	0.0309977	0.0708889	0.320838	0	0.042626	0.0314407	0.00126719	0	0.0676767	0.00452668	0.065964	0.0449652	0	0.0760911	0.0825969	0	0.0183557	78	FEMALE	Stage IB	T2	N0	M0	I	3
TCGA-37-4130	0	0.020581	0	0.0218355	0	0.0375316	0.0983449	0.0859575	0.00250533	0.00894756	0.0319046	0	0.0767334	0	0.021186	0.101865	0	0	0.360719	0.089401	0.0424876	0	56	MALE	Stage IA	T1b	N0	M0	I	4
TCGA-37-A5EM	0	0.0515295	0.0367518	0.0137967	0	0.177295	0.0847731	0.276811	0.00787038	0.01395	0.0280899	0	0	0.00485266	0.0116796	0	0.109055	0	0.103362	0.0445553	0	0.0356279
TCGA-39-5031	0	0.102022	0	0	0	0.0609709	0.0788379	0.235431	0	0.0321063	0.00370237	0.00975413	0.0125736	0	0.208188	0	0.0977263	0	0.107865	0.0459007	0	0.00492152	76	FEMALE	Stage IA	T1a	N0	M0	I	4
TCGA-43-7657	0	0.0926785	0	0	0	0.346642	0.0227712	0.304296	0	0.0259178	0	0	0.00368134	0	0.137997	0	0.00182954	0	0.0180609	0.0413437	0	0.00478192	68	FEMALE	Stage IA	T1	N0	MX	I	4
TCGA-46-3766	0	0.0767397	0	0.0671402	0	0.00837681	0.0637448	0.202912	0	0.112246	0.01526	0	0.0245649	0	0.160071	0.023887	0.0914171	0	0.0979575	0.0525402	0	0.00314372	62	FEMALE	Stage IA	T1	N0	M0	I	4
TCGA-46-3767	0.0483774	0.0184578	0.0297772	0.0333683	0	0.0274963	0.0307996	0.261948	0.0119732	0.0665302	0.015832	0.0103043	0	0.0152419	0.0633354	0	0.291658	0	0.0624984	0.0124021	0	0	76	MALE	Stage IA	T1a	N0	M0	I	3
TCGA-46-6026	0.0319687	0.00781475	0	0	0	0.416554	0.032241	0.205963	0	0.0156678	0	0.00693532	0	0.0561376	0.0572444	0	0	0.0445614	0.0715977	0.0533141	0	0	81	MALE	Stage IIB	T2a	N1	M0	II	3
TCGA-51-4079	0	0.114409	0.00722114	0.0192587	0	0.0145821	0.0782731	0.190531	0.0405097	0	0.0215461	0	0.0224424	0	0.184222	0	0.0613119	0	0.139208	0.0829841	0	0.0235002	73	FEMALE	Stage IB	T2	N0		I	4
TCGA-52-7622	0	0.106902	0.00467796	0.0259826	0	0.0797532	0.0942807	0.202809	0	0.0557663	0.0243749	0.0104797	0.0406992	0.0328412	0.0660478	0.0187399	0.0767252	0	0.0594508	0.100469	0	0	62	FEMALE	Stage IA	T1a	N0	M0	I	4
TCGA-56-5898	0	0.0542309	0.014439	0.0406616	0	0.0442281	0.0146866	0.350986	0	0.0608202	0.0423824	0.0104608	0.023057	0	0.0379744	0.000926624	0.136016	0	0.111121	0.0471104	0	0.0108987	69	MALE	Stage IA	T1b	N0	M0	I	2
TCGA-56-8309	0	0.0935683	0	0.00847113	0	0.0706267	0.0825196	0.186096	0	0.0370368	0.0324818	0	0.012969	0	0.116932	0.025632	0.144312	0	0.11258	0	0	0.0767744	66	MALE	Stage IA	T1b	N0	MX	I	2
TCGA-58-8388	0	0.12781	0	0.016029	0	0.0619282	0.127573	0.16329	0	0.0346868	0.0114567	0	0.0251261	0	0.0512135	0	0.103763	0	0.118486	0.10391	0	0.0547276	60	MALE	Stage IB	T2a	N0	M0	I	2
TCGA-60-2703	0.0570528	0	0.0653425	0	0	0.229566	0.00948929	0.0900292	0.0679615	0	0.0022647	0.00410299	0	0.0739227	0.139038	0	0.213094	0	0.0481364	0	0	0	73	MALE	Stage IIB	T2	N1	M0	II	4
TCGA-60-2709	0	0.0582856	0	0	0	0.248316	0.0286872	0.326123	0	0.0138828	0	0.00204115	0.00971079	0	0.106282	0.00467035	0.0661581	0	0.0831834	0.0296478	0	0.0230117	69	MALE	Stage IB	T2	N0	MX	I	2
TCGA-63-A5MB	0	0.120603	0.0238903	0	0	0.0520802	0.143778	0.241127	0.0235894	0	0.00641654	0	0	0.0344011	0.0478984	0.010983	0	0	0.126361	0.168872	0	0	62	MALE	Stage IB	T2	N0	M0	I	3
TCGA-66-2780	0.0226733	0.00403148	0.0327658	0	0	0.18016	0.0657607	0.302633	0.044297	0	0	0.0306888	0	0.0240809	0.147233	0.00631354	0.0442211	0	0.0567203	0.035064	0	0.00335722	65	MALE	Stage IB	T2	N0	M0	I	3
TCGA-66-2786	0	0.139334	0.0220241	0.0345507	0	0	0.0468252	0.282167	0	0.0418048	0.0151513	0.021123	0.0022754	0.0127424	0.132473	0	0	0	0.128446	0.0869681	0	0.0341146	68	FEMALE	Stage IA	T1	N0	M0	I	4
TCGA-66-2788	0	0.050974	0.0306121	0.00420352	0	0.0254616	0.101471	0.207511	0.049898	0	0.0186908	0.0529524	0	0.00445565	0.147393	0	0.146354	0	0.111543	0.0204229	0	0.0280565	56	MALE	Stage IB	T2	N0	M0	I	4
TCGA-66-2790	0	0.109165	0	0.0125111	0	0.0395881	0.20225	0.0975066	0	0.0585911	0.0260543	0	0.0350204	0	0.0799215	0	0.135982	0	0.161316	0.0157371	0	0.0263579	72	MALE	Stage IIB	T2	N1	M0	II	4
TCGA-68-8250	0.0188004	0.00391559	0.0458914	0	0	0	0.082278	0.373369	0	0.0347234	0.0206645	0.00941514	0.0341391	0.00732391	0.0353	0	0.140201	0	0.106792	0.0871871	0	0	66	MALE	Stage IA	T1a	N0	MX	I	4
TCGA-68-A59J	0.00691691	0.0192734	0.0114093	0.0292739	0	0	0.206793	0.179292	0.0049826	0	0.0351704	0	0.0619934	0.0505044	0.0345162	0.0691922	0	0	0.167202	0.12348	0	0	74	FEMALE	Stage IB	T2a	N0	MX	I	4
TCGA-77-8139	0.0311312	0	0	0.00677791	0	0.19453	0.0429198	0.192136	0.018102	0	0	0	0	0.0783191	0.131122	0.0515941	0.0904644	0	0.0878256	0.0750777	0	0	72	MALE	Stage IIB	T3	N0	M0	II	2
TCGA-77-A5G1	0	0.0741291	0	0	0	0.157797	0.0486383	0.303353	0	0.027542	0	0	0.0533591	0	0.0101627	0	0.171171	0	0.0648718	0.0646742	0	0.0243018	75	MALE	Stage IIIA	T3	N1	M0	III	4
TCGA-77-A5G7	0	0.202992	0.0358248	0.0197213	0.000462197	0.0435572	0.0880488	0.117531	0.0548099	0	0	0	0	0.00402099	0.155671	0	0	0	0.158281	0.085943	0	0.0331368	63	MALE	Stage IA	T1	N0	M0	I	2
TCGA-77-A5GH	0	0.154117	0	0.0469802	0	0.0493968	0.134602	0.101638	0	0.0255924	0.0256364	0.00328162	0.0350523	0	0.176578	0	0.0650698	0	0.0795748	0.0429685	0	0.0595108	81	MALE	Stage IB	T2a	N0	M0	I	3
TCGA-85-8352	0.0711911	0	0.0545348	0	0	0.186931	0.053192	0.145529	0.0199231	0.0099396	0	0	0	0.049621	0.0720198	0.0110232	0	0	0.197513	0.128583	0	0	67	MALE	Stage IIIA	T3	N1	M0	III	2
TCGA-90-7964	0.0257268	0	0.0606962	0.0175101	0.0371777	0.0216895	0	0.481971	0	0.0512691	0.0369231	0.0213161	0.0298353	0.0216594	0.0143957	0	0.0709109	0	0.0304362	0.0784829	0	0	70	MALE	Stage IB	T2a	N0	MX	I	4
TCGA-94-8035	0	0.205407	0.00894388	0.000570423	0.00067281	0.099646	0.0380145	0.106409	0.0559904	0	0.0433805	0.0216714	0	0.00627028	0.260256	0	0.0514952	0	0.0554843	0.0457884	0	0	64	MALE	Stage IIB	T3	N0	MX	II	2
TCGA-94-8490	0	0.193678	0.0292422	0.0194578	0	0	0.0450153	0.135988	0.0015673	0.0397147	0.0329359	0	0.0390638	0.00652912	0.120463	0	0	0	0.233475	0.102871	0	0	70	MALE	Stage IIB	T3	N0	M0	II	5
TCGA-98-8022	0.0123859	0.015675	0	0.00941562	0	0.190501	0.0699865	0.157198	0	0.0208414	0.0296388	0	0.0701369	0	0.0517369	0	0.0808369	0	0.143235	0.129952	0	0.0184606	61	MALE	Stage IA	T1a	N0	M0	I	4
TCGA-98-A53C	0.0766865	0.0700659	0.00707634	0	0	0.0274128	0.025912	0.216724	0	0.0761049	0.0281717	0	0	0.0217088	0.0825499	0.0030559	0.233931	0	0.11863	0.0119698	0	0	77	FEMALE	Stage IA	T1a	N0	M0	I	4
TCGA-L3-A524	0.0169784	0.011617	0	0	0.00549098	0.256351	0.0811417	0.358811	0	0	0	0	0	0	0.0791734	0.00350693	0	0	0.127635	0.059294	0	0	45	FEMALE	Stage IIB	T3	N0	M0	II	2
TCGA-NC-A5HD	0	0.00693825	0.170923	0	0	0.0307309	0	0.0549992	0	0.0329336	0.00898858	0.00296935	0.0300668	0	0.543292	0	0	0	0.0246549	0.0935033	0	0	79	MALE	Stage IIB	T3	N0	M0	II	4
TCGA-NC-A5HJ	0	0.0950747	0.0176986	0.0206372	0	0.0329311	0.0983057	0.293051	0.00321891	0.00534755	0.0286645	0	0.0221087	0.0116147	0.0315009	0	0.0284132	0	0.241855	0.067361	0	0.00221739	59	MALE	Stage IIB	T3	N0	M0	II	4
TCGA-NK-A5CX	0	0.13369	0.00164816	0.00460334	0	0.0414006	0.0942126	0.221115	0	0.0186649	0.0244887	0.0166351	0.0754219	0	0.141498	0	0.0250237	0	0.111204	0.0797367	0	0.0106569	73	MALE	Stage IIA	T2b	N0	MX	II	4
TCGA-NK-A7XE	0.0252418	0	0.121923	0	0	0.0935482	0.0422436	0.103607	0.0284672	0	0.065782	0	0.0829504	0	0.030288	0	0	0	0.18276	0.210761	0	0.0124282	66	MALE	Stage IIIB	T4	N2	M0	III	5
TCGA-18-3415	0	0.0761064	0.00768339	0.0223546	0	0.0114466	0.134772	0.160739	0	0.0438212	0.00956834	0.0153768	0.0171365	0.0291672	0.0309659	0.0244042	0.25156	0	0.10433	0.0605676	0	0	77	MALE	Stage IB	T2	N0	M0	I	3
TCGA-21-1081	0.00741077	0	0.0408428	0	0	0.109144	0	0.306163	0.0830537	0	0.0343988	0.0192964	0	0.0557954	0.127814	0	0.0980444	0	0.0675909	0.0504448	0	0	69	MALE	Stage IIB	T2	N1	M0	II	4
TCGA-21-5784	0.0626418	0.00052437	0.0821937	0.0253997	0	0	0.0352817	0.261594	0	0.0108205	0.0324188	0.0149796	0.00822977	0	0.136573	0	0.107708	0	0.133885	0.0656176	0.0028992	0.0192325	80	FEMALE	Stage IB	T2	N0	M0	I	3
TCGA-21-5787	0	0.0669296	0.00866091	0.00469712	0	0.00376828	0.0308009	0.0956917	0	0.0577142	0.0273943	0.0107878	0.10406	0	0.103702	0.0543258	0	0	0.309535	0.0821205	0	0.0398119	65	MALE	Stage IIIA	T2	N2	M0	III	4
TCGA-33-AASD	0.0513748	0	0.0549977	0.0131855	0.0193036	0.140391	0.0794847	0.274237	0.0459477	0	0	0	0.00612648	0.024326	0.0106872	0	0	0.0617406	0.0928596	0.125339	0	0	83	MALE	Stage IA	T1	N0	MX	I	2
TCGA-34-5927	0.0466538	0	0	0	0	0.0438972	0.0846875	0.298133	0.0287636	0	0	0.00258939	0.00429244	0.0731166	0.0924258	0.0148419	0.098255	0	0.0625362	0.149808	0	0
TCGA-34-7107	0	0.138082	0	0.00526399	0	0.0424	0.0557891	0.336341	0	0.043011	0	0.00752123	0.0178822	0	0.109627	0	0.112826	0	0.0770646	0.0332077	0	0.0209842	70	MALE	Stage II	T2a	N0	M0	II	4
TCGA-34-8454	0	0.0806573	0.00658159	0.0106942	0	0.0181941	0.0724558	0.158375	0	0.125756	0.0354747	0	0.0700716	0	0.101264	0.0375988	0.120469	0	0.0927498	0.0568673	0	0.0127903	62	FEMALE	Stage IIIA	T3	N1	M0	III	4
TCGA-37-4129	0	0	0.0463912	0	0.0339135	0	0	0.471849	0.117577	0	0.042482	0	0.0517829	0	0	0	0.0226542	0	0.144517	0.0688332	0	0	52	FEMALE	Stage IA	T1b	N0	M0	I	4
TCGA-37-4132	0.0110652	0.0253658	0	0	0.0036574	0.0598352	0.0889705	0.195212	0.0239296	0	0.0100302	0.00199099	0.0369934	0	0.14913	0	0.0940135	0	0.190756	0.0922985	0	0.016751	61	FEMALE	Stage IV	T2	N0	M1	I	1
TCGA-37-A5EN	0	0.15323	0	0.00570994	0	0.140317	0.112091	0.167873	0	0.0305803	0.00149614	0	0.0180309	0	0.0890438	0.000131572	0.0160333	0	0.129675	0.126849	0	0.00893832
TCGA-39-5030	0	0.0502479	0	0.000532136	0	0.152648	0.0706344	0.164625	0	0.0180022	0.00230765	0.000530817	0.0281087	0	0.160951	0.00515075	0.130804	0	0.103606	0.051686	0	0.0601668	81	FEMALE	Stage IIIA	T2a	N2	M0	III	3
TCGA-43-8115	0	0.0762148	0.00410918	0.0182085	0	0.0387443	0.0497341	0.279618	0	0.0171029	0.0306641	0	0.00360872	0.00969084	0.109343	0.000468452	0.221004	0	0.117342	0.0177542	0	0.00639371	72	FEMALE	Stage IIA	T2a	N1	MX	II	4
TCGA-43-A474	0	0	0.0137078	0	0	0.36962	0.00380913	0.173368	0.0449686	0.0472621	0	0	0	0.0703544	0.0877255	0	0.0869492	0.0713263	0.020938	0.00997097	0	0	66	MALE	Stage IIA	T2b	N0	M0	II	4
TCGA-43-A56U	0.0358048	0.134314	0.0163562	0.0088471	0	0.0299298	0.0237267	0.0679301	0.0279565	0	0.0380017	0	0	0.0542968	0.271789	0.0276914	0.0194764	0	0.0947774	0.132394	0	0.0167087	76	FEMALE	Stage IA	T1b	N0	MX	I	4
TCGA-56-7579	0	0.0702788	0	0.00366853	0	0.236056	0.0122619	0.350082	0.117124	0	0	0.00537503	0	0.033703	0.0121746	0	0.0905415	0	0.0245167	0.0258757	0	0.0183425	61	MALE	Stage IIIA	T3	N1	M0	III	4
TCGA-56-8083	0	0.321597	0.00381649	0	0	0.0518652	0	0.238088	0	0.0241359	0.0232098	0	0.0633799	0	0.0676281	0	0.051327	0	0.0926579	0.0622952	0	0	56	MALE	Stage IB	T2a	N0	MX	I	4
TCGA-56-8201	0.00276091	0.0149926	0	0.00710725	0	0.145449	0.0856997	0.311804	0.0368103	0	0	0	0	0.0383366	0.00524207	0.0208364	0.177801	0	0.136239	0	0	0.0169212	74	MALE	Stage IIB	T3	N0	MX	II	4
TCGA-56-8304	0	0.142231	0.021721	0.0138756	0	0.0605058	0.0258582	0.0971554	0.0367889	0	0.0403882	0	0.0227787	0.0528522	0.185218	0.0410157	0.0774846	0	0.109453	0.0458044	0	0.0268698	73	FEMALE	Stage IA	T1b	N0	MX	I	2
TCGA-56-8623	0	0.0358807	0	0.00453887	0	0.13438	0.0101725	0.318816	0.0831757	0	0.0603407	0.019364	0	0.0715702	0.018285	0	0.119695	0	0.0769376	0.0291538	0	0.0176887	71	MALE	Stage IB	T2a	N0	MX	I	2
TCGA-56-A4BW	0	0.0895572	0.0386946	0	0	0.0683837	0.0564233	0.198237	0	0.0697735	0.01238	0.018395	0.0485392	0	0.142201	0	0.0487062	0	0.104551	0.0979813	0	0.00617648	55	MALE	Stage IIA	T2a	N1	M0	II	4
TCGA-58-8390	0	0.0769307	0.00582939	0	0	0.276133	0.0535401	0.172894	0.0647142	0	0.0156603	0.00276675	0.0427025	0	0.0585725	0	0.127173	0	0.0475777	0.0555065	0	0	70	MALE	Stage IIA	T2b	N0	M0	II	4
TCGA-58-A46J	0.0330972	0.0445502	0.0384688	0	0	0.0240033	0.0425244	0.284177	0	0.0645618	0.0713879	0.0228746	0	0.0478531	0.0608782	0	0	0	0.117507	0.105318	0	0.042798	64	MALE	Stage IIB	T2	N1	M0	II	2
TCGA-58-A46K	0.0175919	0.0284431	0.060383	0	0	0.0062656	0.10259	0.198039	0.0127103	0.0203101	0.00820269	0.00228906	0	0.0889353	0.0998175	0.0707265	0	0	0.18573	0.0977182	0	0.000247786	59	MALE	Stage IIIA	T2	N2	M0	III	4
TCGA-60-2695	0.0351361	0.0131545	0.00501898	0.00433005	0.00276576	0.0150235	0.0712902	0.179399	0	0.0318511	0.0547443	0	0.0127626	0.0433411	0.0766327	0.00782628	0.094046	0	0.267197	0.0694974	0	0.0159833	74	FEMALE	Stage IB	T2	N0	M0	I	3
TCGA-63-5131	0.0101299	0.00635202	0.205911	0	0	0.0481127	0.00388883	0.126335	0	0.0919657	0.0838732	0.0655229	0.0162174	0	0.0460356	0	0	0	0.139451	0.15054	0	0.00566514		MALE	Stage IIB	T2	N1	M0	II	4
TCGA-63-A5MU	0.0165525	0.0059027	0.165255	0	0	0	0.0456866	0.146303	0	0.16846	0.035882	0.0109325	0.0187524	0.0210122	0.155326	0	0.007114	0	0.0510547	0.151766	0	0	48	MALE	Stage IIB	T2b	N1	M0	II	4
TCGA-63-A5MY	0.0226842	0	0.0494857	0	0	0	0.0212646	0.214891	0.0115975	0	0.00177238	0.109101	0	0.0797778	0.262475	0	0	0.0945516	0.0785342	0.0538652	0	0	63	MALE	Stage IA	T1b	N0	M0	I	4
TCGA-66-2789	0.0488135	0.00654403	0.0804725	0	0	0.0968345	0.0332621	0.349341	0	0.057679	0.0292104	0	0.0328203	0.0257826	0.0848181	0	0.0785132	0	0.0512907	0.024618	0	0	73	MALE	Stage IIIB	T1	N3	M0	III	4
TCGA-77-8146	0	0.146462	0	0	0	0.156029	0.030533	0.235127	0	0.0429715	0	0.0108725	0.0497285	0	0.156902	0	0	0	0.0841652	0.0872087	0	0	72	MALE	Stage IA	T1	N0	M0	I	2
TCGA-77-8148	0.000114236	0.026476	0	0.00237128	0	0.158501	0.103325	0.242815	0	0.0333512	0.0179374	0	0.0225008	0.0410697	0.108226	0	0.015651	0	0.12013	0.0717957	0	0.0357364	68	MALE	Stage IIIA	T3	N1	M0	III	4
TCGA-85-8287	0.0577334	0.0464209	0.0356367	0	0	0.0501805	0.0589168	0.153819	0.0148664	0.0371061	0.0265973	0	0	0.0191341	0.049639	0.0279778	0.166811	0	0.159828	0.0849655	0	0.0103671	72	MALE	Stage IA	T1b	N0	M0	I	2
TCGA-85-A53L	0.0344595	0.036753	0.0781198	0	0	0.273888	0.0069059	0.0281644	0.16382	0	0	0.0136201	0	0.0944121	0.0345066	0	0.169324	0	0.062932	0.0030956	0	0	63	MALE	Stage IIA	T2b	N0	M0	II	4
TCGA-90-7766	0.116925	0.0238082	0.0176823	0.0120437	0	0.00643445	0.023142	0.246543	0.0394831	0	0.0558051	0.0100698	0	0.0418876	0.134352	0.0208681	0.0239772	0	0.158246	0.0516985	0	0.0170339	66	FEMALE	Stage IA	T1b	N0	MX	I	2
TCGA-90-7769	0	0.216901	0.0635698	0.00198134	0	0.0570501	0.00194461	0.176004	0.067412	0	0.0630707	0.00418167	0.00352338	0.00701194	0.170648	0.00669388	0.0377785	0	0.0530267	0.0557185	0	0.0134844	55	MALE	Stage IIB	T2b	N1	MX	II	3
TCGA-92-7340	0	0.104874	0.0421217	0.00853745	0	0.00833469	0.13143	0.179117	0	0.0414659	0.0250161	0.0111234	0	0.0183558	0.10067	0.0314579	0.116827	0	0.113599	0.0471452	0	0.0199242	45	FEMALE	Stage IIA	T2a	N1	MX	II	4
TCGA-94-A4VJ	0	0.0581604	0.0215114	0.0632415	0	0.141183	0.057376	0.200417	0	0.0254446	0.00611103	0	0.0720931	0	0.0939824	0	0.0478992	0	0.0867915	0.0888801	0	0.0369094	71	FEMALE	Stage IA	T1b	N0	M0	I	4
TCGA-21-1080	0	0.129046	0.0261193	0	0	0.0325274	0.0371453	0.158643	0.020363	0	0.0341853	0	0.0292485	0	0.114252	0.0541011	0.0899435	0	0.179851	0.0804268	0	0.0141483	66	MALE	Stage IB	T2	N0	M0	I	4
TCGA-22-4593	0	0.0194811	0	0	0	0.0951216	0.036162	0.19425	0.0583521	0	0.00402338	0.021785	0.00226449	0.0178559	0.113105	0	0.309202	0	0.122296	0.00610175	0	0	77	MALE	Stage IIA	T2b	N0	M0	II	4
TCGA-22-4594	0.0164487	0.0296574	0	0.0435216	5.87973e-05	0.0587029	0.0480737	0.149268	0.00793665	0	0.0119077	0.00524959	0	0.0275784	0.387426	0.0145864	0.08916	0	0.0762821	0.0138542	0	0.0202874	60	FEMALE	Stage IIIA	T3	N2	M0	III	4
TCGA-22-4595	0	0.0438923	0	0	0	0.0732302	0.0443591	0.296656	0.00446856	0	0.0109798	0.0342609	0.0135068	0.0206911	0.216974	0	0.147563	0	0.0766909	0.0133882	0	0.00334049	57	MALE	Stage IIIA	T3	N2		III	2
TCGA-22-4607	0	0.203811	0	0.0272108	0.0113659	0.0612759	0.0207278	0.245145	0.00742288	0.01356	0	0.042022	0	0.0152067	0.213965	0	0.0641634	0	0.0410056	0	0	0.0331181	75	MALE	Stage IB	T2a	N0	M0	I	3
TCGA-22-4613	0	0.0392666	0	0.0156667	0	0.00583088	0.117017	0.274205	0	0.0398983	0.0443639	0	0.0148916	0.0339734	0.0644957	0.021914	0.135671	0	0.125445	0.0484841	0	0.0188774	73	FEMALE	Stage IA	T1b	N0	M0	I	3
TCGA-22-5472	0	0.00444101	0.0318503	0.0207496	0	0.0478134	0.00840733	0.497548	0	0.0466843	0.017061	0.0445973	0.00981725	0.0254627	0.00967665	0	0.140807	0	0.0625413	0.032543	0	0	67	MALE	Stage IB	T2a	N0	M0	I	4
TCGA-33-4583	0.023854	0.0123316	0.105732	0.0122413	0	0.00619226	0.0710452	0.185449	0.071625	0	0.00863331	0.000833976	0.00833515	0.039447	0	0.0558173	0	0	0.284097	0.113604	0	0.000762114	73	MALE	Stage IA	T1	N0	M0	I	4
TCGA-33-A4WN	0	0.134503	0.000946014	0	0	0.122777	0.028273	0.191325	0	0.0402647	0.00493339	0	0.00480426	0.00162567	0.198752	0	0.116486	0	0.0538423	0.0859645	0	0.0155029	60	MALE	Stage IB	T2a	N0	MX	I	2
TCGA-34-2609																							81	MALE	Stage IIB	T2	N1	M0	II	4
TCGA-34-5232	0.0529431	0.100677	0.0330621	0.0292264	0	0.0756786	0.0576555	0.155008	0	0.0215416	0	0	0	0	0.038257	0.00298932	0.177817	0	0.0697	0.0990336	0	0.0864106
TCGA-37-3789	0	0	0.0626464	0.00625996	0	0.0341327	0.128084	0.252691	0	0.0143719	0.0287297	0.0269822	0.0250817	0.00175677	0.0240403	0.0745445	0	0	0.18369	0.136988	0	0	65	MALE	Stage IB	T2	N0		I	1
TCGA-37-3792	0.0109994	0.0152929	0.0379071	0	0	0.163776	0.0291601	0.396826	0.0386525	0	0	0.0470364	0.0338155	0	0.000137121	0.0211998	0.0579714	0	0.0741317	0.0730938	0	0	69	MALE	Stage IB	T2	N0	M0	I	1
TCGA-37-A5EL	0	0.00590365	0.336194	0	0	0	0	0.0863885	0.0148121	0	0.0175897	0	0.0419378	0.0767011	0.0235096	0	0	0	0.202868	0.194096	0	0
TCGA-39-5019	0.0122936	0.0285578	0.0408568	0.0247697	0	0.188361	0.0328899	0.212805	0.00588498	0.0319947	0.000175567	0	0	0	0.0568673	0	0.249278	0	0.0912596	0.0240057	0	0	70	MALE	Stage IB	T2a	N0	M0	I	3
TCGA-39-5039	0	0.225573	0.0205112	0	0	0	0.0578802	0.244168	0.0344093	0	0	0.00663871	0	0	0.231998	0	0.0714883	0	0.0789525	0.0283803	0	0	76	MALE	Stage IIA	T2b	N0	M0	II	3
TCGA-43-3394	0	0.157047	0.00941995	0.0247344	0	0.097644	0.0137821	0.234558	0.0161481	0.00979888	0.0236888	0.00727708	0	0.032915	0.157276	0	0.0933552	0	0.0587905	0.0635647	0	0	52	MALE	Stage IB	T2a	N0	M0	I	2
TCGA-46-3768	0	0.0946482	0	0.0099326	0	0.0652241	0.0259564	0.423176	0	0.0726524	0.0344084	0.00985453	0	0	0.0152577	0.00376668	0.0516316	0	0.141791	0.0416047	0	0.0100958	58	MALE	Stage IIIA	T3	N1	M0	III	4
TCGA-51-4081	0	0.142474	0	0	0	0.340121	0	0.15874	0.0825353	0	0	0.00640665	0	0.00825218	0.0310488	0	0.152939	0.040465	0.0370184	0	0	0	55	MALE	Stage IIB	T2a	N1	M0	II	2
TCGA-52-7810	0.0216403	0	0.037648	0	0	0.508003	0	0.118558	0.0959835	0	0.00764609	0	0	0.0689401	0.0168058	0	0.0637646	0.0478987	0.0125597	0.000552657	0	0	60	FEMALE	Stage IIB	T3	N0	M0	II	3
TCGA-56-5897	0	0.0311205	0	0.0106451	0	0.110787	0.0808283	0.221449	0	0.036207	0.0130857	0.00628965	0.000406862	0.0155471	0.20478	0.00963226	0.17942	0	0.079802	0	0	0	74	MALE	Stage IA	T1b	N0	MX	I	3
TCGA-56-6546	0	0.0668456	0	0.0197635	0	0.149023	0.0933678	0.146493	0.00665226	0.0138885	0	0	0.04197	0.00774494	0.0921443	0.0238705	0.106866	0	0.150035	0.0654692	0	0.0158671	67	MALE	Stage IIA	T2b	N0	MX	II	4
TCGA-56-7221	0.0444596	0.00831447	0.0158923	0	0	0.472782	0.000203244	0.270885	0.0126454	0	0	0.0028082	0	0.0442049	0.0255728	0	0	0	0.0240455	0.0687778	0	0.00940896	79	MALE	Stage IB	T2	N0	M0	I	3
TCGA-56-7582	0.0266806	0	0	0.0431847	0	0.185697	0.148512	0.300223	0.0342979	0	0.0303433	0	0.0167125	0	0.000642421	0	0.0357545	0	0.126855	0.0510959	0	0	83	MALE	Stage IB	T2a	N0	M0	I	3
TCGA-56-8305	0	0.0394273	0	0.00828774	0	0.341633	0.0347545	0.298689	0.0122939	0	0	0	0	0.048502	0.0809283	0.0112794	0.0550746	0.0250641	0.0361103	0.0079552	0	0	72	MALE	Stage IB	T2a	N0	M0	I	3
TCGA-56-8622	0	0.182325	0.013568	0.00433689	0	0.0715246	0.0105493	0.154909	0.0195523	0.0104835	0.0166246	0.0108961	0	0.0272617	0.321009	0	0.0360114	0	0.0295741	0.0546993	0	0.0366749	68	MALE	Stage IB	T2a	N0	M0	I	3
TCGA-56-8624	0	0.0989066	0	0.0178959	0	0.0201991	0.0232474	0.203198	0	0.0658109	0.0263182	0.00352129	0.0196415	0.00483722	0.148773	0	0.232654	0	0.057667	0.0773305	0	0	84	MALE	Stage IIB	T3	N0	MX	II	3
TCGA-56-A4ZJ	0	0.00800605	0	0.0398786	0	0.0403766	0.058757	0.467057	0	0.0708177	0.0395718	0.0157212	0.0232182	0	0.0132641	0	0.125694	0	0.0578221	0.0398155	0	0	75	FEMALE	Stage IA	T1a	N0	M0	I	4
TCGA-56-A4ZK	0	0.0472181	0	0.0124788	0	0.222857	0.122188	0.243778	0.0644119	0	0.00778331	0.000269776	0.0104722	0.0114615	0.0463884	0.00913631	0.0635093	0	0.071847	0.0550919	0	0.0111096	76	FEMALE	Stage IB	T2	N0	M0	I	4
TCGA-58-8391	0	0.0990077	0.000560656	0	0	0.116905	0.0419185	0.230249	0.051735	0	0.0333153	0.0245048	0.0190009	0.0197677	0.121227	0	0.0677362	0	0.0972845	0.0767882	0	0	57	FEMALE	Stage IIIA	T2	N2	M0	III	2
TCGA-60-2707	0	0.11075	0.0346197	0	0	0.0892338	0.00236537	0.236357	0.0813705	0	0.0163995	0.0747731	0	0.0839863	0.0812038	0	0.129857	0	0.023161	0.024212	0	0.0117119	70	MALE	Stage IB	T2	N0	M0	I	3
TCGA-60-2713	0	0.0697752	0	0	0	0.164599	0.0356351	0.330616	0.00923496	0.00892988	0.0130958	0.0023566	0	0.0447169	0.0680981	0.0136181	0.143496	0	0.0903294	0.00549907	0	0	64	MALE	Stage IB	T2	N0	M0	I	2
TCGA-63-7022	0	0.0422462	0	0	0	0.0147547	0.0403223	0.228271	0	0.0590036	0.0279001	0.00448159	0.00945006	0.00829553	0.259938	0.0106402	0.187458	0	0.0800955	0	0	0.0271436		FEMALE	Stage IA	T1	N0	M0	I	4
TCGA-63-A5MM	0	0.0252429	0.00991414	0.0173227	0.00752616	0	0.1334	0.313071	0.0666309	0	0.02017	0.00398555	0.0631345	0	0.00150513	0.0453371	0.0709325	0	0.151596	0.0574375	0	0.0127939	69	FEMALE	Stage IIB	T2	N1	M0	II	3
TCGA-66-2792	0	0.0499787	0	0.010734	0	0.000306585	0.1145	0.341666	0.00835647	0.0136351	0.048454	0	0	0.0635468	0.0224408	0.00455212	0.218085	0	0.103745	0	0	0	58	MALE	Stage IIB	T2	N1	M0	II	4
TCGA-66-2795	0	0.0584517	0	0.016796	0.00384183	0.0310157	0.0989198	0.39871	0.0176669	0.00428406	0.0135463	0.016368	0	0.021355	0.0713483	0	0.124203	0	0.0758429	0.041236	0	0.00641391	68	MALE	Stage IIIB	T4	N1	M0	III	4
TCGA-77-7140	0	0.0211375	0	0.00970554	0	0.08955	0.124488	0.454073	0	0.0248434	0	0.00153496	0.0410034	0	0.0433766	0	0.0894521	0	0.0737081	0.0271281	0	0	69	FEMALE	Stage IIB	T2	N1	M0	II	1
TCGA-77-7142	0	0.0258028	0.00901384	0.0384522	0	0.0976034	0.0311387	0.410402	0	0.119984	0.00992083	0.0027808	0.020313	0	0.00741334	0	0.115934	0	0.077995	0.0332462	0	0	59	FEMALE	Stage IB	T2	N0	M0	I	4
TCGA-77-8008	0	0.116275	0.00453945	0.00746948	0	0.0436848	0.0165432	0.213624	0.127999	0	0.0183069	0.0156555	0	0.0644	0.0814955	0	0.234678	0	0.0553291	0	0	0	68	MALE	Stage IB	T2	N0	M0	I	4
TCGA-85-7698	0	0.0898272	0	0.002484	0	0.178118	0.0819185	0.219146	0.00262542	0.0100271	0	0	0.0254068	0.0302699	0.085155	0	0.0566728	0	0.132863	0.0576067	0	0.0278789	48	MALE	Stage IA	T1b	N0	M0	I	3
TCGA-85-7699	0.0152063	0.0122548	0	0.0146496	0	0.0749221	0.103826	0.163773	0	0.035925	0.0171322	0	0.106508	0	0.00542866	0.0300446	0.107093	0	0.156475	0.0866636	0	0.0700989	73	MALE	Stage IIIA	T4	N0	M0	III	3
TCGA-85-8048	0.0705412	0.038718	0.0467568	0.0024618	0	0.0552495	0.0827899	0.148476	0.0219995	0	0.0437801	0	0.0115565	0.0273218	0.0336394	0.019983	0.121017	0	0.144529	0.114508	0	0.0166723	62	MALE	Stage IA	T1	N0	M0	I	2
TCGA-85-8277	0.0418378	0.00535863	0	0	0	0.0702607	0.143391	0.236727	0.0177323	0	0.0188095	0	0	0.0638125	0.0910431	0.00116068	0.0286788	0	0.147785	0.0823733	0	0.051029	70	MALE	Stage IIIA	T3	N1	M0	III	1
TCGA-85-8288	0.0285826	0	0.0509909	0.0500709	0	0	0.121451	0.172354	0	0.0279562	0.0149925	0	0.0281998	0	0.020001	0	0.0615305	0	0.238676	0.138362	0	0.0468336	70	MALE	Stage IIA	T1b	N1	M0	II	2
TCGA-85-8353	0	0.121876	0.00394784	0.000120115	0	0.10757	0.0552758	0.196532	0.0368525	0	0	0	0	0.02964	0.158695	0.00824881	0.147661	0	0.115595	0.0179863	0	0	72	MALE	Stage IIIA	T3	N1	M0	III	2
TCGA-85-8582	0	0.172964	0.00336429	0	0	0.237914	0.0543999	0.147204	0	0.0231154	0	0	0.00330975	0.0228827	0.18425	0	0.0559484	0	0.032736	0.0569199	0	0.00499165	49	MALE	Stage IA	T1a	N0	M0	I	2
TCGA-85-8584	0	0.119552	0	0.00604054	0	0.0508971	0.0736626	0.0555118	0	0.0353912	0.015267	0	0.0695956	0	0.148485	0.0273997	0.0536239	0	0.190071	0.0833634	0	0.0711399	71	MALE	Stage IIA	T2a	N1	M0	II	2
TCGA-LA-A446	0.033509	0.116195	0.0181627	0.0044993	0	0.068263	0.00408605	0.264723	0.0146531	0.0682226	0.0394842	0.00504042	0.0308212	0.0238484	0.0233781	0	0.0075046	0	0.151672	0.125938	0	0	68	MALE	Stage IA	T1b	N0	MX	I	2
TCGA-NC-A5HL	0.0738607	0	0	0.0137727	0	0.106495	0.156649	0.21129	0	0.0268684	0.0322019	0	0.0413265	0.0131701	0.0321433	0.0297212	0.0150279	0	0.17993	0.0675427	0	0	73	MALE	Stage IIA	T2b	N0	M0	II	4
TCGA-NC-A5HP	0.0369039	0	0.0423628	0	0	0.28105	0.0255001	0.325828	0.0127562	0.00710887	0	0	0	0.0406748	0.0750433	0	0.0262566	0	0.0305842	0.0959306	0	0	69	MALE	Stage IV	T2a	N0	M1b	I	2
TCGA-O2-A52Q	0.0216977	0.0176654	0	0.00946699	0	0.287054	0.125603	0.266313	0.0116162	0.000328826	0	0	0.0218262	0.00165128	0	0.00597388	0.0527528	0	0.0827612	0.0581034	0	0.0371859	44	FEMALE	Stage III	T3	N1	MX	III	2
TCGA-O2-A52S	0	0.0817798	0	0.0348129	0	0.119829	0.121457	0.219307	0	0.00697724	0.0200938	0	0.0329733	0	0.120216	0.00108802	0.0658801	0	0.091538	0.0810197	0	0.00302795	57	FEMALE	Stage III	T4	N2	MX	III	4
TCGA-18-3406	0	0.0804212	0.0131367	0.0265724	0.015018	0	0.0995678	0.129373	0.0242361	0	0.0384218	0.0235407	0	0	0.264043	0.0118459	0.0906196	0	0.109037	0.0704001	0	0.00376643	67	MALE	Stage IA	T1	N0	M0	I	4
TCGA-18-3408	0	0.0618371	0.0711544	0.0975829	0	0	0.0505422	0.387629	0	0.0372038	0.00398138	0.00125316	0.00141633	0	0.0102808	0.0436181	0.105969	0	0.0776552	0.0182955	0.0315813	0	77	FEMALE	Stage IB	T2	N0	M0	I	4
TCGA-18-5592	0	0.0243698	0.00436685	0.0255279	0	0.0389773	0.0525499	0.110684	0	0.108062	0.030931	0	0.056321	0.0828912	0.0318178	0.0237876	0.190784	0	0.188969	0.0299603	0	0	57	MALE	Stage IIB	T3	N0	M0	II	3
TCGA-21-1072	0	0.102468	0.0133315	0.0356594	0.0024827	0	0.081116	0.293326	0.0881029	0	0.0804281	0.0309241	0	0.0334869	0.0529289	0	0.0286304	0	0.0746838	0.0787024	0	0.00372865	75	MALE	Stage IB	T2	N0	M0	I	3
TCGA-21-1079	0	0	0.0488057	0	0	0.230838	0.0185537	0.373978	0.0708731	0	0	0	0.0472717	0	0.0586264	0	0.125236	0	0.0238744	0.00194274	0	0	71	MALE	Stage IIIA	T3	N0	M0	III	3
TCGA-22-4591	0.0476447	0	0.017144	0.022356	0	0	0.0668126	0.334346	0	0.106416	0.0477414	0	0.0430792	0	0.013234	0	0.102698	0	0.175739	0.0148496	0	0.00794032	80	MALE	Stage IIIA	T3	N2	M0	III	2
TCGA-22-5482	0	0.100887	0.00265265	0.0471939	0	0.181841	0.0268343	0.286641	0	0.0297282	0	0	0.0324899	0	0.194039	0	0.0655893	0	0.029159	0.00294492	0	0	81	MALE	Stage IB	T2a	N0	M0	I	4
TCGA-33-4538	0	0.0952893	0.00432918	0.05429	0	0	0.0695096	0.191692	0.0573443	0.016628	0.0432139	0.0154706	0	0	0.0743562	0	0	0	0.239981	0.126878	0	0.0110174	66	MALE	Stage IIIA	T2	N2	M0	III	2
TCGA-33-4547	0	0.212185	0.0166878	0.00850864	0	0.0106048	0.0167749	0.202655	0	0.134701	0.0192164	0.0227802	0.0160766	0	0.175292	5.60293e-05	0.0784688	0	0.0317468	0.0279203	0	0.0263258	68	MALE	Stage IB	T2	N0	M0	I	3
TCGA-33-4582	0	0.0856365	0.0696243	0.0216272	0	0.0765984	0.0830509	0.189971	0.043302	0	0.00297061	0	0.0348416	0	0.107295	0	0	0	0.142307	0.134494	0	0.00828063	55	MALE	Stage IA	T1	N0	M0	I	2
TCGA-33-AASB	0.112796	0	0.0502399	0	0	0.297743	0.00249665	0.235215	0	0.020264	0	0.000933753	0.0654628	0	0.0423764	0	0.011565	0	0.0464928	0.0896168	0	0.0247979	66	MALE	Stage IB	T2	N0	MX	I	2
TCGA-33-AASI	0	0.214505	0.0490808	0	0	0.0706183	0.16545	0.0457048	0	0.00961378	0	0	0	0	0.140165	0.00352817	0.0233951	0	0.139315	0.10174	0	0.0368851	65	FEMALE	Stage IIB	T2	N1	MX	II	4
TCGA-34-2605																							76	MALE	Stage IIIB	T4	N1	M0	III	4
TCGA-37-3783	0	0.0630429	0.0496095	0.0377709	0.00527726	0	0.0944146	0.146781	0.0352561	0	0	0.066807	0	0	0.0586591	0.0249083	0.0609604	0	0.240728	0.0898576	0.0249693	0.000958841
TCGA-37-4133	0.0118344	0.00727855	0.0136904	0.0823204	0.00418225	0	0.137462	0.243631	0.00511199	0	0.0129525	0.00385431	0.00377514	0.0171796	0.119868	0.0183915	0.0814866	0	0.169506	0.0674745	0	0	63	MALE	Stage IIIA	T4	N0	M0	III	4
TCGA-39-5022	0.0271742	0.00305373	0	0.0196663	0	0.0314358	0.140915	0.182406	0	0.0219017	0.00582202	0.00432824	0.0248916	0	0.150503	0.0075094	0.0987286	0	0.158536	0.0979806	0	0.0251472	76	MALE	Stage IB	T2a	N0	M0	I	4
TCGA-39-5034	0	0.0877072	0	0.0386834	0	0.0177218	0.0360624	0.139343	0	0.0328645	0.0234864	0	0.0270784	0.0152551	0.282696	0.0242419	0.148745	0	0.0732541	0.0320309	0	0.0208298	73	FEMALE	Stage IIB	T3	N0	M0	II	4
TCGA-43-5668	0	0.0591526	0	0.00305112	0	0.149652	0.091014	0.267678	0	0.0231948	0	0	0.0132032	0.0119177	0.00485432	0.0192452	0.139146	0	0.143845	0.0334272	0	0.0406191	78	MALE	Stage IIA	T1b	N1	M0	II	3
TCGA-43-6647	0.0370598	0.00931396	0	0.00962121	0	0.191898	0.0751381	0.264543	0.0244853	0	0	0	0.0169566	0.0152289	0	0	0.261126	0	0.0587494	0.0358789	0	0	69	FEMALE	Stage IIB	T2b	N1	MX	II	4
TCGA-43-7658	0	0.0111572	0	0	0	0.000137598	0.110198	0.253848	0.0110579	0	0.00101593	0	0.0484997	0	0.00700171	0.0105798	0	0	0.358787	0.162456	0	0.0252599	75	FEMALE	Stage IA	T1	N0	M0	I	4
TCGA-43-A56V	0.105048	7.75421e-05	0.0786507	0	0	0.019624	0.0322837	0.251024	0	0.0751604	0.0165242	0.0283348	0.0613111	0	0.0531001	0	0.0577556	0	0.0954259	0.12568	0	0	61	MALE	Stage IIIA	T2a	N2	M0	III	4
TCGA-51-4080	0.0241224	0	0.0191847	0.00601455	0.0180549	0.108878	0.0759234	0.417116	0	0.00107452	0	0	0.026669	0	0.0171423	0	0.251562	0	0	0.0267212	0	0.00753633	65	MALE	Stage IIIB	T4	N1		III	4
TCGA-56-1622	0	0.132769	0.196185	0	0	0.0633307	0.0095769	0.143368	0.145379	0	0.00444215	0.0196761	0	0.0531066	0.09006	0	0.00868566	0	0.0749812	0.0501743	0	0.00826559	58	MALE	Stage IB	T2	N0	M0	I	4
TCGA-56-8503	0.0123067	0.00775717	0	0.0081823	0	0.194041	0.0954569	0.239717	0.0902496	0	0.0424811	0.0181194	0	0.0829559	0.0157253	0.0252136	0	0	0.0761463	0.0682283	0	0.0234195	76	FEMALE	Stage IIB	T3	N0	M0	II	2
TCGA-56-8626	0.0349704	0	0.00752684	0.083749	0	0.0578883	0.0259749	0.230635	0	0.130149	0.0872065	0.00503426	0.0759865	0	0.0720396	0	0.0444248	0	0.0833105	0.0543022	0	0.00680269	59	MALE	Stage IA	T1a	N0	MX	I	2
TCGA-56-8628	0	0.0712654	0.0336866	0	0	0.110142	0.0327247	0.277743	0	0.0219615	0.0230083	0	0.00980374	0	0.0635047	0	0.225544	0	0.122596	0.0053405	0	0.00268008	78	MALE	Stage IA	T1b	N0	MX	I	4
TCGA-58-8386	0.00693307	0.00478146	0	0	0	0.0739784	0.0615039	0.509246	0	0.0546787	0.0426534	0.0508572	0	0	0.0227174	0.00257276	0.0383803	0	0.0772709	0.0544262	0	0	75	MALE	Stage IV	T3	NX	M1	I	2
TCGA-60-2704	0	0.106684	0	0	0.00203468	0.0816843	0.0482584	0.300522	0.013724	0.0106049	0.0114957	0.0159429	0	0.0366431	0.0893338	0.0511532	0.187404	0	0.044515	0	0	0	73	MALE	Stage IIB	T2	N1	M0	II	2
TCGA-60-2708	0	0.00976951	0.0281645	0.00025842	0	0.207661	0	0.378601	0.0748649	0	0	0.015523	0	0.00773496	0.00534504	0	0.195884	0.041072	0.0351216	0	0	0	64	FEMALE	Stage IIB	T2	N1	M0	II	4
TCGA-60-2720	0	0.125322	0	0.0154318	0	0.186235	0.0645092	0.144053	0	0.0379143	0	0.0117449	0	0	0.16793	0.0368217	0.0111502	0	0.0999808	0.0463352	0.00782065	0.0447509	60	FEMALE	Stage IB	T2	N0	M0	I	4
TCGA-63-6202	0	0.0348556	0	0.0310521	0	0.0212416	0.0685594	0.314011	0	0.0229045	0.0215262	0.0075337	0.0459965	0	0.0169146	0.0176875	0.150082	0	0.162325	0.0463371	0	0.038973		MALE	Stage IIA	T2	N0	M0	II	4
TCGA-63-A5MI	0	0.276383	0.0827006	0	0	0.0465682	0.000306429	0.149627	0	0.0346432	0	0.0200404	0	0.00984761	0.262123	0	0	0	0.0733044	0.0432281	0	0.00122768	65	MALE	Stage IIIA	T2	N2	M0	III	4
TCGA-66-2744	0.0312121	0.0193032	0.0221031	0	0	0.123319	0.0998106	0.251906	0	0.00460169	0.00471568	0.0207009	0.0170413	0	0.041831	0.000826361	0.153067	0	0.138109	0.0647382	0	0.00671447	71	MALE	Stage IIB	T2	N1	M0	II	4
TCGA-66-2763	0	0.16489	0.0419038	0	0	0.0364095	0.067159	0.185592	0	0.086752	0.0223972	0.0061135	0.0785572	0	0.152826	0	0.0516453	0	0.0841162	0.0190362	0	0.00260175	63	FEMALE	Stage IB	T2	N0	M0	I	4
TCGA-68-7755	0	0.0527252	0.0591424	0.0162299	0	0.0109138	0.08705	0.335095	0	0.0398591	0.00883369	0	0.0336151	0	0.049513	0.00303598	0.143483	0	0.104033	0.0564706	0	0	60	FEMALE	Stage IIA	T1b	N1	M0	II	4
TCGA-77-7335	0	0.039049	0	0.00226197	0	0.0406941	0.14432	0.260434	0	0.00673044	0.01621	0	0.0477821	0	0.053509	0.0356723	0	0	0.22615	0.0624755	0	0.0647117	62	FEMALE	Stage IIIB	T4	N2	M0	III	3
TCGA-77-8128	0	0.00343841	0	0	0	0.322675	0.0532824	0.278238	0.030829	0.0331485	0	0	0	0.0518257	0.0466439	0	0.0486974	0	0.0674797	0.0512811	0	0.012461	60	MALE	Stage IIIA	T2	N2	M0	III	2
TCGA-77-8131	0	0.0516298	0	0.0103897	0	0.279564	0.0375174	0.190411	0.0187429	0.00063569	0.0462685	0	0.00877312	0.0247273	0.0541639	0	0.0554475	0	0.0805291	0.0694511	0	0.0717497	72	MALE	Stage IB	T2	NX	M0	I	4
TCGA-77-8138																							74	MALE	Stage IB	T2	N0	M0	I	4
TCGA-77-8143	0	0.0426537	0.0625464	0	0	0.230121	0.0695947	0.234766	0	0.0174896	0.0386263	0	0.013693	0	0.0308904	0.00374988	0	0	0.158385	0.0313951	0	0.0660887	76	MALE	Stage IIIA	T2	N2	M0	III	4
TCGA-77-8150	0	0.0616547	0	0.0386827	0.00292657	0.0745779	0.119896	0.141595	0.0166422	0	0.0446231	0	0.050116	0	0.036044	0.0153339	0	0	0.248212	0.132821	0	0.0168741	64	MALE	Stage IIIA	T3	N1	M0	III	2
TCGA-85-6175	0.00708867	0.00706794	0.0263074	0.143205	0	0.00935341	0.0395063	0.293166	0	0.0634429	0.0273688	0	0.0251189	0	0.00692207	0	0.172175	0	0.106544	0.02333	0	0.0494033	63	FEMALE	Stage IIB	T3	N0	M0	II	1
TCGA-85-8049	0	0.103049	0	0	0	0.169569	0.0566053	0.228574	0.0159118	0.00104583	0	0	0.00294039	0.00661416	0.0721445	0.0249165	0.0784917	0	0.106587	0.118002	0	0.0155497	57	MALE	Stage IB	T2a	N0	M0	I	1
TCGA-85-A512	0	0.00829786	0	0.00237812	0	0.35859	0.100911	0.230848	0	0.0280115	0	0	0.0131235	0	0.0536629	0	0.0605025	0	0.042132	0.101542	0	0	46	MALE	Stage IIA	T1b	N1	M0	II	2
TCGA-85-A5B5	0.0549536	0.0220224	0	0	0	0.161028	0.0973427	0.332184	0	0.00147856	0	0	0.0257404	0.00658176	0.109883	0	0	0.0321202	0.086697	0.0509863	0	0.018982	58	MALE	Stage IA	T1b	N0	M0	I	4
TCGA-92-8063	0	0.0173442	0.138229	0.00727532	0	0.0858283	0	0.339886	0	0.0106557	0.0356368	0.0331787	0	0.0180715	0.0529527	0	0	0	0.130519	0.130422	0	0	52	MALE	Stage IIIA	T2b	N2	MX	III	2
TCGA-94-7557	0	0.0412736	0.0343695	0.0392606	0.0154797	0.298264	0.0428023	0.292339	0	0	0.0107848	0.00683359	0.0385693	0	0.0300042	0	0.0439349	0	0.0349663	0.0581813	0	0.0129373	73	MALE	Stage IB	T2	N0	M0	I	2
TCGA-98-7454	0	0.104629	0.00938585	0.00742143	0.0122852	0.00271109	0.0786984	0.165048	0	0.0796919	0.0444343	0	0.0278819	0.0339141	0.0470118	0.0178875	0.25706	0	0.066986	0.0449534	0	0	73	MALE	Stage IB	T2a	N0	M0	I	3
TCGA-L3-A4E7	0	0.0386604	0.0264919	0	0	0.0844222	0.0834935	0.239999	0.004202	0.0603888	0.00720603	0.0333841	0.0368871	0	0.141243	0	0.0683232	0	0.0542124	0.0730086	0	0.0480782	71	MALE	Stage IB	T2a	N0	M0	I	2
TCGA-NC-A5HK	0	0.0434748	0.209599	0	0	0.00898741	0.0203479	0.0940095	0	0.00661512	0.0109372	0.0111827	0.169611	0	0.150625	0	0.0442858	0	0.13538	0.0867329	0	0.0082122	58	FEMALE	Stage IIB	T3	N0	M0	II	4
TCGA-18-3411	0	0.0352322	0	0.0777539	0	0.0669428	0.0983273	0.351788	0	0.0391845	0.010648	0.0071336	0	0.0486554	0.048454	0.0264246	0.0912091	0	0.0543556	0.0321911	0	0.0116998	63	FEMALE	Stage IIIA	T2	N2	M0	III	2
TCGA-18-3416	0.0234665	0.00339077	0	0.00505575	0	0.0165846	0.0873494	0.236834	0.0117297	0	0	0.00549594	0.0668596	0	0.0197192	0.0623005	0	0	0.348449	0.0862674	0	0.0264976	83	MALE	Stage IIB	T2	N1	M0	II	3
TCGA-21-5786	0	0.0743436	0	0.0102259	0	0.106019	0.0579958	0.190085	0	0.0281264	0	0.0191704	0.038099	0	0.225981	0	0.046339	0	0.0991115	0.0577701	0	0.0467334	64	MALE	Stage IB	T2	N0	M0	I	2
TCGA-22-1011	0.0895037	0.0058241	0.0271552	0	0	0.0234142	0.0349362	0.127124	0.01742	0.00274582	0.014692	0.00520375	0	0.0509698	0.295078	0.0116736	0.162441	0	0.0721555	0.0388434	0	0.0208196	73	MALE	Stage IB	T2	N0	M0	I	2
TCGA-22-1012	0	0.0962054	0	0.000428064	0.00562881	0.278943	0.0382055	0.138604	0.106687	0	0	0	0	0.0288056	0.0913692	0	0.0426068	0	0.0948291	0.0615334	0	0.0161538	80	FEMALE	Stage IB	T2	N0	M0	I	4
TCGA-33-4586	0	0.148665	0.0271473	0.0409918	0	0.106474	0.0207794	0.282648	0.0158351	0	0.0207284	0	0.00308935	0.031377	0.119105	0	0.156547	0	0.026612	0	0	0	57	MALE	Stage IIIA	T2	N2	M0	III	4
TCGA-33-AASJ	0	0.153444	0.00976061	0	0.00601525	0.104256	0.0239787	0.069871	0.0206483	0	0	0.00559531	0.0117763	0.0264507	0.330607	0.0527557	0	0	0.141075	0.0437657	0	0	60	MALE	Stage IB	T2	N0	MX	I	4
TCGA-39-5016	0	0.0679266	0	0.0297371	0	0.0106964	0.186788	0.239668	0	0.0814066	0.0171254	0	0.0322181	0	0	0.0258788	0.0429813	0	0.160191	0.0808315	0	0.0245512	44	MALE	Stage IIA	T2a	N1	M0	II	4
TCGA-39-5021	0	0.0131523	0	0.0230029	0	0.0835637	0.121124	0.214232	0	0.0241283	0.0172102	0	0.0256489	0	0.106028	0	0.171204	0	0.150935	0.0497713	0	0	70	MALE	Stage IB	T2a	N0	M0	I	4
TCGA-39-5024	0.048475	0.0331359	0.0738941	0.00439193	0	0.0295516	0.140859	0.19043	0	0.0420118	0.00294811	0	0.0570503	0	0	0	0.102064	0	0.0916899	0.136441	0	0.0470583	65	FEMALE	Stage IIIA	T2a	N2	M0	III	4
TCGA-39-5027	0	0.0822034	0.0641428	0.0446016	0	0.0256983	0.125558	0.232462	0	0.0382536	0.0114136	0	0.0678784	0	0.0229612	0	0.0261636	0	0.120963	0.1377	0	0	73	MALE	Stage IB	T2a	N0	M0	I	4
TCGA-39-5028	0	0.10459	0.0147	0.0134681	0.00183004	0.0130114	0.0634279	0.195132	0	0.0559732	0.0307219	0.0180753	0.0393291	0.00180514	0.233902	0.000462862	0.0361759	0	0.102694	0.0552544	0	0.0194464	75	MALE	Stage IIIA	T4	N1	M0	III	3
TCGA-39-5035	0.0198206	0.00330594	0	0	0	0.0229098	0.0967886	0.210286	0	0.0124833	0.0016775	0.00890741	0.0619931	0	0.16269	0.0064005	0	0	0.308379	0.0799584	0	0.00439913	72	FEMALE	Stage IA	T1b	N0	M0	I	4
TCGA-39-5036	0	0.0880915	0.00323133	0.0282112	0	0.0967144	0.0230098	0.265222	0	0	0	0	0.0494493	0	0.149997	0	0.0225628	0	0.177103	0.0694822	0	0.0269262	73	MALE	Stage IB	T2	N0	M0	I	4
TCGA-43-5670	0.042674	0	0.200669	0	0	0.328305	0	0.0295818	0.126979	0	0	0.0574486	0	0.0287635	0.0266645	0	0	0	0.00458577	0.154329	0	0	70	MALE	Stage IIA	T2b	N0	M0	II	3
TCGA-43-6143	0	0.188259	0.0135935	0	0	0.122779	0.0387096	0.19031	0	0.021266	0.0297584	0	0.022532	0.0462848	0.127959	0	0.0725613	0	0.0693992	0.0482022	0	0.00838626	70	MALE	Stage IB	T2	N0	M0	I	4
TCGA-43-7656	0.0449966	0.0674084	0.00113463	0.00458287	0	0.0381479	0.149932	0.103583	0	0.0203194	0.0370954	0	0.0273105	0.0229285	0.0904879	0	0.0890502	0	0.169135	0.109561	0	0.024326	71	MALE	Stage IA	T1b	N0	MX	I	4
TCGA-43-8116	0.0809807	0.0156197	0.0575874	0	0	0.0648149	0.044887	0.155534	0.0130398	0.00310064	0.0117382	0	0.00610927	0.0500067	0.100142	0.0275293	0.187859	0	0.0752346	0.105817	0	0	73	MALE	Stage IA	T1b	N0	M0	I	2
TCGA-46-3769	0	0.00993238	0	0.0102518	0	0.00170972	0.0607151	0.496611	0	0.0349118	0.0125127	0	0.00146669	0.00146493	0.0281286	0.0179032	0.112781	0	0.15899	0.0320727	0	0.0205478	57	MALE	[Discrepancy]	T4	N0	M0	[Discrepancy]	4
TCGA-56-6545	0.00314956	0.0221561	0	0	0	0.250094	0.084228	0.196863	0.0332444	0	0	0.000469223	0	0.0468333	0.0600362	0	0.246805	0	0.0518375	0	0	0.00428354	77	FEMALE	Stage IB	T2a	N0	M0	I	4
TCGA-56-7822	0	0.0778352	0.030475	0.0224706	0	0.0416032	0.00234888	0.483138	0	0.0541977	0.0149918	0.0151166	0.0408387	0	0.0548834	0	0.0730168	0	0.0618816	0.0246861	0	0.00251618	75	MALE	Stage IIB	T2b	N1	M0	II	4
TCGA-56-8082	0	0.040132	0.0906746	0.00541963	0	0.183225	0.0598725	0.156003	0.119368	0	0	0.026798	0	0.0401283	0.103856	0	0.0407057	0.0243808	0.0525666	0.0486441	0	0.0082267	80	FEMALE	Stage IIA	T2b	N0	MX	II	3
TCGA-56-8625	0	0.0613744	0	0.0152043	0	0.0879114	0.0902591	0.23736	0	0.00628823	0.0327745	0	0.017047	0.0404735	0.104723	0	0.116478	0	0.100891	0.0466768	0	0.0425378	66	FEMALE	Stage IIIA	T3	N1	MX	III	2
TCGA-56-A49D	0	0.0486729	0.0652583	0	0	0.0211579	0.103712	0.291143	0.00693116	0.0114017	0.0156619	0	0.00488237	0.0191232	0.0441838	0	0.0915574	0	0.172741	0.0928318	0	0.0107413	67	MALE	Stage IIIA	T2a	N2	MX	III	4
TCGA-56-A5DR	0	0.02121	0.0229175	0.00825627	0	0.0143496	0.0877594	0.243108	0.0693128	0	0.0293277	0.00764589	0.0189795	0.0556065	0.0393458	0.0352051	0.135272	0	0.137167	0.0745368	0	0	81	MALE	Stage IA	T1a	N0	MX	I	1
TCGA-58-A46N	0	0.0139252	0.0570764	0.0381657	0	0.0128482	0.0210889	0.163499	0	0.190481	0.0429172	0	0.0213399	0.0521399	0.102576	0	0.0988165	0	0.128003	0.0571233	0	0	52	MALE	Stage IB	T2a	N0	M0	I	2
TCGA-60-2698	0	0.0408732	0.0132785	0.0339949	0	0.0303872	0.0252581	0.293257	0.00087579	0.0182312	0.0552707	0.0256361	0	0.0153505	0.00890737	0.0322902	0.106919	0	0.231076	0.0343459	0	0.0340492	62	MALE	Stage IIB	T2	N1	M0	II	4
TCGA-60-2719	0	0.0637454	0	0	0	0.0646073	0.065229	0.367412	0	0.0164931	0.0522524	0.00456824	0	0.0323152	0.0566457	0	0.156484	0	0.0896024	0.0273361	0	0.00330924	83	FEMALE	Stage IB	T1	N0	M0	I	3
TCGA-63-7021	0.00458136	0.000317458	0.0424803	0	0	0.0977647	0.0484403	0.174728	0	0.00260105	0.0108588	0.00756352	0	0.0314813	0.295596	0.00287085	0.175538	0	0.0869063	0.0117309	0	0.00654156		MALE	Stage IA	T1	N0	M0	I	4
TCGA-63-7023	0.0932396	0	0.00723551	0.0221799	0.00892602	0	0.0894611	0.30989	0	0.0209741	0	0	0.0417557	0.0148306	0.0759253	0	0	0	0.145448	0.124178	0	0.0459562		MALE	Stage IIA	T1	N1	M0	II	4
TCGA-63-A5MP	0	0.139368	0.0483709	0	0	0.0988666	0.048582	0.191237	0	0.00858206	0.00381994	0	0	0.0286953	0.115982	0.0281859	0.185199	0	0.082559	0.0140813	0	0.00647186	56	MALE	Stage IIB	T2	N1	M0	II	4
TCGA-66-2755	0	0.0249065	0.0107604	0.011869	0	0.258706	0.0935092	0.176219	0.0895302	0	0.0405441	0.00929494	0.00532516	0.0150364	0.000293795	0	0.195612	0	0.046166	0.0132482	0	0.00897912	63	MALE	Stage IB	T2	N0	M0	I	3
TCGA-66-2768	0.0797233	0	0.16528	0	0	0.0588774	0.00155473	0.37434	0.0630524	0	0	0.028156	0	0.0444085	0	0.030462	0	0.0137491	0.063536	0.0768603	0	0	57	MALE	Stage IIB	T2	N1	M0	II	2
TCGA-66-2771	0.0167609	0.0361914	0.0401098	0.0187084	0.0026187	0.0435816	0.074793	0.196954	0.0164309	0	0.00985	0.0598858	0	0.00495917	0.230957	0.0108844	0.0306302	0	0.113863	0.0877128	0	0.00510868	60	MALE	Stage IIB	T2	N1	M0	II	4
TCGA-66-2782	0	0.105127	0	0.0246468	0	0.0353051	0.0789031	0.347543	0	0.0188319	0.0110849	0.0651906	0.0059336	0.0147111	0.0873027	0	0.0833295	0	0.0592359	0.050913	0	0.0119408	71	MALE	Stage IIB	T3	N0	M0	II	4
TCGA-66-2794	0.000721826	0.0236176	0	0.0410061	0	0.0171872	0.134972	0.171535	0	0.0488638	0.0243603	0	0.0886381	0.0029235	0.0176592	0.0281827	0	0	0.270234	0.0943762	0	0.0357228	64	MALE	Stage IIIB	T4	N2	M0	III	4
TCGA-68-7757	0	0.0789822	0.00880952	0	0	0.203872	0.00205054	0.248834	0.102701	0	0	0.0171959	0	0.0459511	0.129799	0	0.0630761	0	0.0318037	0.0404451	0	0.0264803	74	MALE	Stage IA	T1b	N0	MX	I	4
TCGA-6A-AB49	0.0246836	0	0	0.00307599	0	0.300486	0.121264	0.0569054	0	0.00405456	0.0062956	0	0.0772192	0	0	0	0	0.00144685	0.254449	0.138942	0	0.0111772	73	FEMALE	Stage IB	T2	N0	MX	I	3
TCGA-77-7139	0.0302437	0.0442206	0	0	0	0.24561	0.0743449	0.290129	0.0347196	0	0	0	0	0.0205375	0.0203754	0	0	0	0.116319	0.0893414	0	0.0341593	56	MALE	Stage IIB	T2	N1	M0	II	4
TCGA-77-7141	0	0.114365	0.000808491	0.0130662	0	0	0.154016	0.369115	0	0.0491519	0.0304835	0	0	0.0376528	0.0344179	0	0.000485186	0	0.0785581	0.11788	0	0	64	MALE	Stage IB	T2	N0	M0	I	4
TCGA-77-7338	0.039209	0.00203049	0.00390299	0.0191684	0	0.203799	0.0221503	0.335012	0.100414	0	0	0.0169464	0	0.00147396	0.0238477	0	0.113798	0	0.0942072	0.0229013	0	0.00113912	64	MALE	Stage IB	T2	N0	M0	I	2
TCGA-77-8130	0.0123165	0.00314297	0	0.00595867	0.00508317	0.420612	0.0166047	0.1489	0.149679	0	0	0	0	0.00490566	0.02003	0	0.0908222	0	0.0352595	0.0654623	0	0.0212228	69	MALE	Stage IIB	T2	N1	M0	II	4
TCGA-77-8154	0.0793274	0.0203848	0.064465	0	0	0.251118	0	0.205407	0	0.10073	0.00664442	0	0.00731318	0.0251119	0.0518467	0	0.025599	0	0.0308428	0.131209	0	0	67	MALE	Stage IA	T1	N0	M0	I	4
TCGA-79-5596	0	0.0976639	0.0156759	0	0	0.390186	0	0.174794	0	0.00154578	0	0	0.0170234	0.0230183	0.0530764	0	0.147598	0	0.0280268	0.0513923	0	0		MALE	Stage IIIA	T3	N1	M0	III	4
TCGA-85-6560	0	0.05315	0	0.00723541	0	0.160548	0.0742026	0.326141	0	0.00541559	0.0159126	0.00647535	0.0219683	0.00858726	0.0714173	0.00278831	0.0776097	0	0.129209	0.037265	0	0.00207403	59	MALE	Stage IIA	T1b	N1	M0	II	4
TCGA-85-7697	0.0504423	0.127061	0.0323693	0.0167999	0	0.0646432	0.0560271	0.133642	0	0.0253241	0.025557	0	0.0049222	0.0246555	0.0663313	0	0.145013	0	0.114903	0.0607146	0	0.051594	49	MALE	Stage IIB	T3	N0	M0	II	3
TCGA-85-A4CN	0	0.066876	0	0	0	0.172571	0.0386825	0.262063	0.0415095	0	0	0	0	0.0182134	0.0299869	0	0.151019	0	0.175406	0.020211	0	0.0234608	56	FEMALE	Stage IIB	T2b	N1	M0	II	4
TCGA-85-A4JB	0	0.162214	0	0	0	0.162256	0.112332	0.0477206	0	0.00514985	0	0.0131021	0.111573	0	0.166603	0	0.101732	0	0.0439909	0.0641528	0	0.00917432	74	MALE	Stage IIB	T3	N0	M0	II	2
TCGA-85-A4QQ	0	0.062637	0	0.0116575	0.000357906	0.325744	0	0.2216	0.0672382	0	0	0.00106919	0	0.061457	0.0991544	0.00538221	0	0.0153793	0.0880216	0.0291911	0	0.0111104	68	MALE	Stage IB	T2a	N0	M0	I	2
TCGA-85-A50M	0.0616017	0	0.0274376	0	0	0.216752	0.00749432	0.21131	0.0627498	0	0.0351671	0.00452038	0	0.0366363	0.10933	0	0.184514	0	0.0223652	0.0201215	0	0	47	MALE	Stage IIA	T2b	N0	M0	II	4
TCGA-90-6837	0	0.0645728	0	0	0	0.139939	0.03293	0.302527	0	0.0113232	0.0212696	0.0110778	0.0266241	0	0.206597	0	0.0685273	0	0.0561089	0.0521939	0	0.00630858	64	MALE	Stage IIB	T3	N0	MX	II	4
TCGA-92-8065	0	0.0285321	0.0131727	0.0217463	0	0.0561887	0.0450093	0.317618	0	0.0192087	0.0128759	0.00938069	0.0345308	0	0.123784	0	0.114565	0	0.0950388	0.0415809	0	0.0667685	74	FEMALE	Stage IIB	T3	N0	MX	II	3
TCGA-94-8491	0	0.172361	0.0151053	0	0	0	0.012593	0.218573	0.0037993	0.0122078	0.0375057	0.0224687	0.0523782	0	0.0999865	0	0.0830034	0	0.142706	0.0423997	0	0.0849134	73	MALE	Stage IIA	T2a	N1	M0	II	3
TCGA-98-8020	0	0.0116778	0	0.0134358	0	0.230525	0.104786	0.216939	0.046844	0	0	0	0	0.0457805	0.0291019	0.00232314	0.19477	0	0.0901575	0	0	0.0136596	56	FEMALE	Stage IIIA	T2	N2	M0	III	1
TCGA-98-A53H	0	0.207296	0.0230737	0	0	0.0435954	0.0344274	0.208319	0	0.0245259	0.0412464	0.00457671	0	0.0190385	0.0713364	0.0313408	0.0489529	0	0.108905	0.07721	0	0.0561559	76	FEMALE	Stage IA	T1a	N0	M0	I	2
TCGA-98-A53J	0	0.115974	0.00409474	0.0100543	0	0.0966672	0.00104738	0.207813	0.180417	0	0.00871136	0.00497688	0	0.0350769	0.0879403	0	0	0	0.0836505	0.145392	0	0.0181849	77	MALE	Stage IB	T2a	N0	M0	I	3
TCGA-NC-A5HO	0.00204054	0.011498	0.0102717	0.0236062	0	0.0568346	0.0961096	0.143736	0.0918025	0	0.0136274	0.0178734	0.0597324	0	0.0515218	0	0	0	0.218887	0.160704	0	0.041755	70	FEMALE	Stage IIIA	T3	N1	M0	III	4
TCGA-NC-A5HR	0.056686	0	0.0662743	0.000637442	0	0.0492573	0.139731	0.185173	0	0	0.00946127	0	0.0336941	0.0458678	0.0540865	0	0	0	0.205014	0.154117	0	0	75	FEMALE	Stage IIA	T2a	N1	M0	II	4
TCGA-O2-A52V	0.0143629	0.0373369	0.0154759	0.0204484	0	0.187466	0.0171462	0.18564	0.0926295	0	0.053205	0	0	0.0863044	0.0172874	0	0.213828	0	0.058869	0	0	0	75	FEMALE	Stage II	T3	N0	MX	II	4
TCGA-O2-A5IB	0	0.213851	0.0537867	0	0	0.0263711	0.0480217	0.167065	0	0.0141279	0.0235641	0	0.0221119	0	0.213029	0	0	0	0.112419	0.105653	0	0	71	FEMALE	Stage III	T3	N1	MX	III	4
TCGA-18-3412	0.0124964	0.00254604	0.0570711	0.0543326	0.0043107	0.0407829	0.106262	0.300082	0.00709157	0.00915101	0.0403721	0.0116776	0	0.0242037	0.0367213	0	0.135529	0	0.0840441	0.0614827	0	0.0118432	52	MALE	Stage IB	T2	N0	M0	I	4
TCGA-21-1071	0	0.0326225	0	0.002982	0	0.0945592	0.133724	0.320074	0.0157415	0	0.0258064	0.032874	0	0.046734	0.0132769	0.0076014	0.165142	0	0.0838756	0.0249859	0	0	67	MALE	Stage IB	T2	N0	M0	I	2
TCGA-22-1017	0	0.0130448	0.0563982	0.0188645	0	0.0264492	0.0301316	0.246825	0	0.120046	0.0150393	0.0129706	0.0722501	0	0.0175056	0	0.0837068	0	0.135582	0.151187	0	0	62	MALE	Stage IA	T1	N0	M0	I	4
TCGA-22-5471	0	0.0820778	0.00118565	0.00439904	0	0.0706525	0.110641	0.140812	0.0355509	0	0	0	0.0528637	0	0.0402862	0.05083	0	0	0.302212	0.0673417	0	0.0411478	75	MALE	Stage IB	T2	N0	M0	I	4
TCGA-33-4587	0.0324292	0	0	0.00536078	0	0.149487	0.0646517	0.206459	0	0.079659	0.0477386	0	0.00889976	0	0.0178676	0	0.170936	0	0.116352	0.0828654	0	0.0172938	63	FEMALE	Stage IB	T2	N0	MX	I	4
TCGA-33-AAS8	0	0.256079	0.0609027	0.0345712	0	0.0271637	0.00883712	0.111143	0.00878763	0	0.00957431	0	0.0834844	0	0.039694	0	0.127208	0	0.134357	0.0981981	0	0	59	FEMALE	Stage IA	T1	N0	MX	I	4
TCGA-34-5241	0	0.0654061	0.0161134	0.0423897	0	0	0.0850561	0.278459	0	0.0355439	0.0465802	0.0136922	0	0.0560302	0.0161273	0.0238821	0.186677	0	0.0725881	0.0407817	0	0.0206727	79	MALE	Stage IB	T2	N0	M0	I	3
TCGA-34-8455	0	0.101822	0.00645011	0	0	0.0350536	0.123852	0.198184	0	0.0883974	0	0.0252372	0.0470208	0.00493226	0.191809	0	0.0832212	0	0.0536075	0.0404134	0	0	67	MALE	Stage IV	T4	N0	M1a	I	4
TCGA-39-5040	0.168349	0.0152932	0.00421867	0	0	0.0573658	0.0685489	0.156563	0	0.0632535	0.029051	0.010984	0	0	0.09016	0	0.00581539	0	0.176669	0.138976	0	0.0147519	59	MALE	Stage IIIA	T2a	N2	M0	III	4
TCGA-43-6773	0.053632	0.0342708	0.00510236	0.0290503	0	0.0314646	0.0444422	0.168668	0.011907	0.0246438	0.0590252	0	0	0.0202315	0.246189	0.00726311	0.0270603	0	0.13379	0.0461829	0	0.0570769	76	MALE	Stage IIB	T2	N1	MX	II	3
TCGA-43-A475	0.015868	0.00356104	0	0.0113732	0	0.0424148	0.124383	0.217219	0.0043797	0.00414222	0.0091113	0.00318552	0.0540935	0	0.0291489	0.0303217	0.0641117	0	0.277829	0.066701	0	0.0421564	67	FEMALE	Stage IIB	T3	N0	M0	II	4
TCGA-46-3765	0	0.101193	0.00589831	0.0345799	0	0	0.0827134	0.234227	0.0117924	0.0113012	0.0311868	0	0	0.00387837	0.248425	0.0293231	0.0544843	0	0.108312	0.0337791	0	0.00890629	59	FEMALE	Stage IA	T1	N0	M0	I	2
TCGA-56-7823	0.0220062	0	0	0.0269729	0	0.142538	0.178136	0.300428	0	0.0434494	0.0338603	0.0118337	0.0481293	0.0090994	0.0164144	0	0.0176338	0	0.0756616	0.069676	0	0.00416131	58	FEMALE	Stage IIA	T1b	N1	M0	II	4
TCGA-56-A4BX	0.0625073	0	0.0360234	0.0374861	0.00234002	0	0	0.380535	0	0.0135013	0.0315754	0	0	0	0.0770771	0	0.0457399	0	0.296628	0.0165871	0	0	70	MALE	Stage IIA	T2b	N0	MX	II	4
TCGA-56-A5DS	0	0.21135	0.0112809	0.0517111	0	0	0.0155592	0.11465	0.0427517	0	0.0377162	0.0288762	0	0.0745249	0.140512	0	0.078661	0	0.0761584	0.0388348	0	0.0774133	72	FEMALE	Stage IB	T2a	N0	MX	I	2
TCGA-58-A46M	0	0.058201	0	0.00718283	0	0.0212766	0.135251	0.308872	0	0.0243859	0.0200632	0	0.0906002	0	0.0392989	0.0619457	0	0	0.162982	0.06994	0	0	61	MALE	Stage IIB	T2b	N1	M0	II	2
TCGA-60-2714	0.0889469	0	0.0378999	0	0	0.0014385	0.0847138	0.315382	0	0.0488673	0.0450718	0	0.0181531	0.0289444	0.049396	0.0307265	0	0	0.0984964	0.130903	0	0.02106	66	FEMALE	Stage IIB	T2	N1	M0	II	4
TCGA-60-2722	0	0.0381853	0.0103691	0.00967694	0	0.0711558	0.0748461	0.429543	0.0129167	0	0.00155042	0.0150321	0	0.0159842	0.0914745	0	0.0645074	0	0.0917703	0.0729881	0	0	66	MALE	Stage IIB	T2	N1	M0	II	4
TCGA-63-A5MR	0.0013167	0.0200968	0.155156	0	0	0.326448	0.0557867	0.111203	0.0422908	0	0	0	0.0179481	0.00743699	0.131089	0	0.0104977	0	0.0331847	0.0875454	0	0	70	FEMALE	Stage IB	T2	N0	M0	I	4
TCGA-66-2758	0	0.0276824	5.46691e-05	0.0239936	0	0.0125687	0.129427	0.220171	0	0.0255889	0.0266535	0.00215995	0.00381218	0.0591115	0.0344863	0.0939968	0	0	0.280631	0.0596621	0	0	71	MALE	Stage IB	T2	N0	M0	I	4
TCGA-68-8251	0	0.0436153	0.0261575	0	0	0.136084	0.0746109	0.256296	0	0.0349822	0	0.00228681	0.0171195	0	0.0946319	0	0.227159	0	0.0858231	0	0	0.00123332	78	MALE	Stage IB	T2a	N0	M0	I	3
TCGA-77-6844	0	0.13281	0.0248023	0.029965	0	0	0.099316	0.193478	0	0.0366177	0.031808	0.0100331	0.00553117	0.00816968	0.145844	0	0.0906062	0	0.0869291	0.0978017	0	0.00628731	74	MALE	Stage IIIA	T3	N1	M0	III	4
TCGA-77-8156	0	0.0691964	0	0.0108968	0	0.109028	0.090451	0.166781	0	0.0193932	0.0236574	0	0.00359236	0.020507	0.0741291	0.0345897	0.144761	0	0.14812	0.0606941	0	0.0242026	60	MALE	Stage IB	T2a	N0	M0	I	2
TCGA-77-A5G8	0.0143265	0.0201268	0	0.0535589	0	0.0349064	0.0875448	0.373231	0.0239628	0	0.0251547	0.00467281	0.0535884	0	0.0556681	0	0.0521169	0	0.141599	0.0502701	0	0.00927175	70	MALE	Stage IIB	T3	N0	M0	II	4
TCGA-85-6798	0	0.12497	0.0537381	0	0	0.186705	0	0.273256	0.108853	0	0	0	0	0.0187589	0.130176	0	0.0277368	0.0118069	0.036102	0.0260801	0	0.00181695	57	MALE	Stage IIIA	T3	N1	M0	III	2
TCGA-85-7696	0.00589392	0.0391985	0	0.00253618	0	0.158039	0.0854985	0.387566	0	0.0146958	0	0	0.0111353	0.0252902	0.0558751	0	0.026884	0	0.0834356	0.0842841	0	0.0196677	64	MALE	Stage IA	T1	N0	M0	I	4
TCGA-85-7844	0	0.07386	0.000680979	0	0	0.201488	0.0262344	0.256348	0.000642553	0.0744607	0	0.00594455	0	0.0371815	0.147076	0.00944062	0.100583	0	0.0545088	0	0	0.0115515	71	MALE	Stage IB	T2a	N0	M0	I	2
TCGA-85-8070	0	0.172441	0.0285209	0	0.0053626	0.058244	0	0.0358667	0	0.0818094	0.0355543	0	0	0	0.33782	0	0.0123902	0	0.14858	0.0516042	0	0.0318068	71	MALE	Stage IB	T2	N0	M0	I	2
TCGA-85-A4JC	0.00341841	0.00848905	0.000329977	0	0	0.148148	0.0639801	0.213632	0.0564197	0	0.0435985	0.0582116	0	0.00626393	0.0425454	0	0.171882	0	0.0845835	0.076594	0	0.0219046	84	MALE	Stage IIA	T2b	N0	M0	II	2
TCGA-85-A4QR	0.0921779	0	0.104885	0	0	0.0267357	0	0.0308509	0	0.0262014	0.0412531	0	0	0.0710457	0.199877	0	0	0	0.137714	0.269259	0	0	67	MALE	Stage IB	T2a	N0	M0	I	4
TCGA-85-A513	0.0811792	0	0.000505015	0	0	0.0521309	0.049841	0.15374	0.0280174	0.0273058	0.0162599	0.00478296	0.0297032	0.0138348	0.103203	0	0.232068	0	0.0866815	0.0905477	0	0.0302004	60	FEMALE	Stage IA	T1a	NX	M0	I	1
TCGA-94-7943	0.0288968	0.00344528	0.0310404	0	0.0265269	0.0926865	0.0165615	0.20883	0	0.0715661	0.0399321	0.0166213	0.0309838	0	0.0619265	0	0.116879	0	0.124853	0.109378	0	0.0198735	80	MALE	Stage IA	T1b	NX	MX	I	3
TCGA-96-7544	0	0.0379658	0.000110824	0.0415196	0	0.0357462	0.097337	0.269395	0	0.0355784	0.043147	0	0	0	0.108224	0.0171686	0.156773	0	0.103211	0.0521748	0	0.00164835	83	MALE	Stage IIB	T2	N1	MX	II	2
TCGA-96-A4JL	0.0280483	0.0643433	0	0.0153714	0	0.0704179	0.150409	0.0823522	0	0.052178	0.0373191	0	0.0610647	0	0	0.00534957	0.143042	0	0.160237	0.0637594	0	0.0661083	78	FEMALE	Stage IIA	T2a	N1	M0	II	1
TCGA-98-8023	0.0588189	0	0	0.00361121	0	0.117465	0.0928309	0.195317	0	0.079802	0.00662632	0	0.0727643	0	0.0176955	0	0.0789771	0	0.138546	0.0760397	0	0.0615051	70	MALE	Stage IIIA	T3	N1	M0	III	2
TCGA-NK-A5CR	0	0.156164	0	0	0	0.0945899	0	0.185602	0.0732098	0	0.0264275	0.000958007	0	0.0723035	0.265615	0.0304608	0.0240771	0	0.0403841	0.0175556	0	0.0126527	77	MALE	Stage IB	T2	N0	MX	I	3
TCGA-NK-A5CT	0	0.0619581	0.085225	0	0	0.0409867	0.0253482	0.107574	0.0536204	0	0.0196639	0.0653343	0.0682882	0.0140273	0.11022	0	0	0	0.138199	0.204771	0	0.00478383
TCGA-XC-AA0X	0.0126754	0.0617437	0.0310405	0	0	0.28454	0	0.213177	0	0.0201325	0	0	0	0.0439175	0.123661	0.0374108	0.122724	0	0.0306008	0.0183769	0	0	77	FEMALE	Stage IA	T1a	N0	M0	I	2
TCGA-18-4086	0	0.0965837	0	0.0641005	0.00896859	0.0139139	0.0882819	0.209331	0.0100018	0.0142651	0.0296501	0.00313928	0.00645533	0.0169951	0.181408	0.00722289	0.0531897	0	0.131455	0.0482196	0	0.0168189	64	MALE	Stage IB	T2	N0	M0	I	4
TCGA-21-1076	0	0.0632951	0	0	0	0.186854	0.112899	0.3101	0	0.0341795	0.000118248	0.00325952	0	0.0143239	0.0575165	0.00195883	0.0968159	0	0.045177	0.0413873	0	0.0321149	54	FEMALE	Stage IB	T2	N0	M0	I	4
TCGA-22-0944	0	0.18122	0	0	0	0.205368	0.0255977	0.117256	0.0833205	0	0	0.00120298	0	0.0132246	0.272247	0	0.0274655	0	0.0422781	0.0192773	0	0.0115424	61	MALE	Stage IB	T2	N0	M0	I	2
TCGA-22-1002	0	0.206123	0.0603776	0	0	0	0.0139143	0.144806	0.0154837	0.0132414	0.0798027	0.0315542	0.00775099	0.0348347	0.0897631	0	0.151346	0	0.0982218	0.0446677	0	0.00811325	69	MALE	Stage IA	T1	N0	M0	I	4
TCGA-22-5474	0	0.06404	0.000278251	0.0308964	0	0	0.134604	0.212789	4.05214e-05	0.00740232	0.0195889	0.00260139	0	0.0468331	0.180473	0.022217	0.0366201	0	0.158515	0.0529077	0	0.030193	74	MALE	Stage IB	T2a	N0	M0	I	4
TCGA-22-5480	0	0.0429679	0	0.0371244	0	0.0796171	0.233628	0.101358	0	0.0132752	0	0.00334339	0.0480172	0	0.0065292	0	0.176097	0	0.0484905	0.117913	0	0.0916375	66	FEMALE	Stage IA	T1b	N0	M0	I	4
TCGA-22-5481	0	0.03551	0	0	0	0.0387765	0.0875946	0.0832755	0	0.00421114	0.00346588	0	0.0647346	0	0.238878	0	0.0798511	0	0.249377	0.0966554	0	0.0176708	72	FEMALE	Stage IIB	T2	N1	M0	II	4
TCGA-22-5483	0	0.0645854	0	0	0	0.185372	0.103826	0.326632	0	0	0	0.00881216	0	0.0217978	0.137726	0	0.0160705	0	0.081763	0.0343916	0	0.0190246	74	MALE	Stage IIA	T1a	N1	M0	II	4
TCGA-22-5491	0	0.122515	0.0193106	0.0249541	0.00174811	0	0.0532467	0.243418	0.0783451	0	0.023924	0.0183013	0	0	0.138625	0.0135541	0	0	0.149991	0.0924021	0	0.0196647	74	MALE	Stage IA	T1a	N0	M0	I	2
TCGA-33-4533	0	0.1258	0.101948	0.0758503	0	0.0474174	0.0187639	0.143144	0	0.0340921	0.0342784	0	0.0142443	0	0.177848	0	0.0960729	0	0.0828137	0.0477277	0	0	76	FEMALE	Stage IB	T2	N0	M0	I	4
TCGA-37-5819	0.0171546	0.0268234	0	0	0	0.0378102	0.0817269	0.156759	0.00642185	0.00776245	0.00148709	0	0.018542	0	0.170343	0.0222509	0.108314	0	0.161959	0.138682	0.00630956	0.037654	64	MALE	Stage IIIA	T2	N2	M0	III	4
TCGA-43-3920	0	0.0569548	0	0.0233651	0	0.0265298	0.0346032	0.274948	0.024523	0	0	0.0176067	0.0151802	0	0.188889	0.0937425	0.0772061	0	0.136838	0.0212945	0.00831866	0	71	MALE	Stage IB	T2	N0	M0	I	4
TCGA-52-7811	0	0.10906	0.00420111	0.00376146	0	0.209003	0.0393255	0.243755	0.0325603	0	0.00519824	0.0117722	0	0.0140564	0.087702	0	0.0739922	0	0.0847146	0.080898	0	0	67	MALE	Stage IB	T2	N0	M0	I	2
TCGA-52-7812	0.0208365	0.00502612	0.00326248	0	0	0.0654008	0.12142	0.204856	0	0.0125818	0.0200319	0.00139863	0.0546726	0	0.00302477	0.0384845	0	0	0.253204	0.116483	0.0317342	0.0475831	68	MALE	[Discrepancy]	T2	N2	M0	[Discrepancy]	4
TCGA-56-7731	0	0.125123	0.0123095	0	0	0.0683099	0.0233616	0.24609	0.0305061	0.0219612	0.0588393	0.0254552	0	0.0209764	0.110755	0.0302027	0.102406	0	0.0614637	0.0436143	0	0.0186266	66	FEMALE	Stage IB	T2a	N0	MX	I	4
TCGA-56-8629	0	0.119515	0.110219	0	0	0.171048	0.00184577	0.166229	0	0.0163923	0.0227844	0.00617375	0.0295363	0.0424023	0.093998	0	0.011947	0	0.124055	0.0838551	0	0	63	MALE	Stage IIA	T2b	N0	MX	II	4
TCGA-58-8393	0	0.0489415	0.0120781	0.000820972	0	0.0950778	0.0825117	0.217866	0.00882305	0	0.0193982	0.0181196	0.0121529	0.0320522	0.0800523	0.0245365	0.0517447	0	0.167811	0.114426	0	0.0135877	68	FEMALE	Stage IB	T2a	N0	M0	I	2
TCGA-60-2711	0	0.0669038	0.0200635	0.00236006	0	0.00631597	0.0668547	0.146872	0	0.0765612	0.0121049	0	0.047955	0	0.191757	0.0172813	0.0229269	0	0.212065	0.0878433	0	0.0221348	64	FEMALE	Stage IB	T2	N0	M0	I	4
TCGA-60-2726	0.0324971	0.060197	0.00195822	0.00139021	0	0.039743	0.130636	0.122155	0	0.0100725	0.0293115	0	0.0317697	0	0.0761219	0	0.120074	0	0.213762	0.130311	0	0	56	MALE	Stage IIA	T2	N1	M0	II	4
TCGA-63-A5ML	0	0.042014	0	0.00545897	0	0	0.084523	0.450204	0	0.0559491	0.0122363	0	0.0400609	0	0.0152089	0	0	0	0.218494	0.0499346	0	0.0259171	68	MALE	Stage IB	T2	N0	M0	I	4
TCGA-66-2753	0	0.131259	0.0177527	0.00418818	0	0	0.04465	0.310774	0	0.0435358	0.0274958	0.0460693	0	0.0143378	0.154951	0.00397472	0.146783	0	0.0470262	0	0	0.00720271	69	MALE	Stage IB	T2	N0	M0	I	4
TCGA-66-2756	0.0300985	0.00393827	0.0117761	0	0	0.000390486	0.0173809	0.356129	0	0	0.0143019	0.00905871	0	0.0316014	0.0946003	0	0	0	0.213521	0.121137	0.00293776	0.0931288	68	MALE	Stage IIIB	T4	N0	M0	III	4
TCGA-66-2759	0.00224667	0.0246151	0	0.0153726	0	0.0747044	0.0974986	0.341625	0.0626369	0	0.0408264	0	0	0.0261624	0	0	0.110269	0	0.109206	0.0818039	0	0.0130331	66	MALE	Stage IIIA	T2	N2	M0	III	3
TCGA-66-2765	0	0.0574481	0.00396788	0.117152	0	0	0.0900854	0.213693	0	0.0617472	0.0243172	0.0132837	0.0330478	0	0.106594	0.0113818	0.123675	0	0.089648	0.032857	0	0.021102	64	MALE	Stage IB	T2	N0	M0	I	4
TCGA-66-2769	0	0.0448239	0	0.0325114	0	0.26818	0.0464684	0.218794	0.0522887	0	0	0.0160275	0	0.00228381	0.0986928	0	0.100914	0	0.0615701	0.033578	0	0.0238679	75	MALE	Stage IIIB	T4	N0	M0	III	3
TCGA-66-2787	0.00383672	0.0309454	0	0.022348	0	0.0450622	0.0838038	0.318384	0	0.0203076	0	0.00400299	0	0.028332	0.0812298	0.0523765	0.0539787	0	0.206366	0.0474075	0	0.00161902	57	MALE	Stage IA	T1	N0	M0	I	4
TCGA-68-A59I	0	0.208247	0.0115797	0	0	0.0716935	0.0185413	0.0927013	0	0.0565182	0.0422276	0	0.0494311	0	0.184987	0	0.0489979	0	0.0879266	0.114382	0	0.0127671	73	FEMALE	Stage IIIA	T3	N1	M0	III	4
TCGA-77-6842	0.0274011	0.0101655	0	0.00542135	0	0.102109	0.0456966	0.131498	0	0.0190429	0.0570928	0.0094199	0.111841	0	0.000842454	0	0.262627	0	0.159683	0.0241231	0	0.0330362	79	MALE	Stage IIB	T2	N1	M0	II	4
TCGA-77-7138	0	0.0058459	0.0133173	0	0	0.278769	0.0115352	0.294353	0.0786502	0	0	0.0097629	0.0259157	0.02723	0.0458116	0.00150633	0.153156	0	0.0351393	0.0190084	0	0	67	MALE	Stage IB	T2	N0	M0	I	3
TCGA-77-8007	0	0.0295892	0	0	0	0.248896	0.0348168	0.410605	0.0456143	0	0	0.00785571	0	0.0128676	0.0224221	0.00919479	0.00394941	0	0.104136	0.0285129	0	0.04154	68	MALE	Stage IIB	T2	N1	M0	II	2
TCGA-77-8153	0.00322894	0.0362812	0.00906299	0.00125123	0.00645827	0.100914	0.0309433	0.19729	0.107264	0	0	0.012046	0	0	0.272213	0	0.00286986	0.0523407	0.135922	0	0	0.0319149	77	FEMALE	Stage IB	T2	N0	M0	I	3
TCGA-85-8276	0	0.0815839	0	0.0186914	0	0.108828	0.11811	0.178336	0.0222808	0	0.00101344	0	0.0240508	0.00598028	0.148388	0.0208088	0.0520384	0	0.140176	0.0508788	0	0.0288348	62	MALE	Stage IIA	T1b	N1	M0	II	2
TCGA-85-8666	0	0.0545358	0.0187665	0	0	0.300433	0.023087	0.23047	0.101413	0	0.000216259	0.00939035	0	0.0552723	0.0109584	0.0372288	0.0400342	0	0.0583276	0.0390696	0	0.0207979	65	MALE	Stage IB	T2a	N0	M0	I	2
TCGA-90-A59Q	0	0.0803268	0.00726614	0.00385929	0	0	0.0608855	0.111404	0	0.0807752	0.00841994	0.062912	0.0609348	0	0.153413	0.0659518	0	0	0.184292	0.0888002	0	0.0307603	61	FEMALE	Stage IIA	T2a	N1	MX	II	2
TCGA-NC-A5HE	0	0.0652657	0	0.0264277	0	0.060848	0.137682	0.132128	0	0.0262586	0.021413	0.0106353	0.0430975	0	0.0605676	0.0754132	0	0	0.270169	0.0570447	0	0.0130495	60	MALE	Stage IIB	T2	N1	M0	II	4
TCGA-NC-A5HI	0	0.0652638	0	0.0516473	0	0.105686	0.0207862	0.213158	0.0296033	0	0.024454	0.0207895	0	0.0575932	0.0741917	0	0	0	0.174195	0.143455	0	0.0191773	68	FEMALE	Stage IB	T2	N0	M0	I	2
TCGA-NC-A5HN	0	0.0206934	0.0405199	0	0	0.0628007	0.142324	0.183597	0.0309863	0	0	0	0.00234987	0.0664473	0.204195	0.0147351	0	0.00315699	0.181159	0.0470351	0	0	77	MALE	Stage IIA	T2a	N1	M0	II	4
TCGA-18-3417	0	0.112015	0	0.0010741	0	0.159056	0.0282455	0.250595	0.0685594	0	0	0.00704354	0	0.0484789	0.130033	0	0.0898734	0	0.0426657	0.0294328	0	0.0329277	65	MALE	Stage IV	T2	N1	M1	I	3
TCGA-18-4721	0.00337605	0.0132615	0	0.00105148	0	0.0754935	0.0842842	0.401917	0	0.0203712	0	0.00295909	0	0.0307805	0.0736851	0.0134116	0.10121	0	0.121239	0.0391594	0	0.0178005	74	MALE	Stage IA	T1	N0	M0	I	4
TCGA-21-1075	0	0.00304935	0.0470204	0.0450308	0	0.0245911	0.0113825	0.324642	0.169511	0	0.0372711	0	0	0.09365	0.122443	0	0.0451601	0	0.0574912	0.0187571	0	0	57	MALE	Stage IIB	T2	N1	M0	II	2
TCGA-22-4599	0	0.0318277	0	0.0193646	0	0.0873961	0.0846486	0.276584	0.00400529	0.00267673	0	0.00424515	0	0.0367698	0.0752941	0.117493	0.0101613	0	0.195331	0.038905	0	0.0152972	73	FEMALE	Stage IB	T2a	N0	M0	I	2
TCGA-22-4609	0	0.0634145	0	0.0118448	0	0.0939391	0.0684106	0.255032	0	0.0216823	0.00994031	0.00377497	0.0169428	0.00606242	0.0898812	0.0170731	0.151578	0	0.137862	0.0355379	0	0.0170249	81	MALE	Stage IA	T1	N0	M0	I	2
TCGA-22-5479	0	0.115717	0	0.0125024	0	0.066627	0.177629	0.157039	0	0.0106009	0.00102794	0.000899001	0.0396388	0	0.211291	0.0165555	0.0231186	0	0.0931525	0.0742008	0	0	64	MALE	Stage IB	T2	N0	M0	I	4
TCGA-33-4589	0	0.00571903	0	0.0203533	0	0.0609411	0.192183	0.343975	0.00956597	0	0.000242771	0.00951728	0.0353584	0	0.00989297	0.0484299	0	0	0.208182	0.0450096	0	0.0106295	62	FEMALE	Stage IIB	T2	N1	M0	II	2
TCGA-33-A5GW	0.0558083	0	0.247544	0.0454747	0	0	0	0.336866	0	0.076505	0.0748648	0.00343348	0	0.0284159	0.0173012	0	0	0.00286226	0.0340227	0.0769016	0	0	67	MALE	Stage IIA	T1a	N1	MX	II	4
TCGA-33-AASL	0	0.0265481	0.11717	0.00402951	0	0.090665	0.0515287	0.153513	0.0349146	0	0.0234278	0.0111335	0.0301032	0.0495833	0.0749863	0.0477124	0.0252773	0	0.156828	0.102579	0	0	57	FEMALE	Stage IA	T1	N0	MX	I	2
TCGA-34-2604																							81	FEMALE	Stage IB	T2	N0	M0	I	2
TCGA-37-4135	0	0.0248987	0	0.0427797	0	0	0.146466	0.340788	0.0450427	0	0.026868	0.0139788	0	0	0.0815053	0.0478607	0	0	0.167947	0.0515562	0.0103087	0	68	MALE	Stage IB	T2a	N0	M0	I	4
TCGA-39-5011	0	0.064743	0	0.0186482	0	0.0341879	0.12974	0.303506	0.0152153	0	0	0.00259063	0.00679323	0.00967227	0.0704917	0.056369	0.0762936	0	0.0896013	0.0697512	0.0413917	0.0110044	70	FEMALE	Stage IA	T1b	N0	M0	I	4
TCGA-39-5029	0	0.13678	0	0.00339591	0	0.065413	0.0926	0.128499	0	0.0661445	0.0117107	0	0.0664527	0	0.174548	0.0117512	0.0299966	0	0.126691	0.0494504	0	0.0365661	67	MALE	Stage IIIA	T1b	N2	M0	III	4
TCGA-39-5037	0	0.10029	0.0491857	0	0.00270656	0.0643578	0.00443925	0.15241	0.0504169	0	0.0379896	0	0.00913106	0	0.131175	0	0.133999	0	0.216039	0.047861	0	0	65	MALE	Stage IIA	T1b	N1	M0	II	2
TCGA-43-6771	0	0	0.0444217	0.0234509	0	0.0701896	0.0372906	0.37245	0.00627228	0	0.00989893	0.00431841	0	0.0423183	0.00509117	0.00673703	0.228045	0	0.129704	0.0174285	0	0.00238355	85	MALE	Stage IB	T2	N0	MX	I	3
TCGA-46-6025	0	0.0901226	0.0438612	0	0	0.0822556	0.0822857	0.219879	0.0393384	0	0.00586714	0	0.012105	0.0161498	0.186677	0.00284872	0.0293308	0	0.131058	0.0487521	0	0.00946917	71	MALE	Stage IIB	T2b	N1	M0	II	4
TCGA-52-7809	0.0661534	0.0145255	0.0122318	0.000583474	0	0	0.0392918	0.2307	0	0.0816859	0.027911	0.00723766	0.0348975	0	0.0751603	0	0	0	0.19114	0.218482	0	0	74	MALE	Stage IB	T2	N0	M0	I	2
TCGA-56-7223	0	0.0327419	0	0	0.0100676	0.384039	0	0.201265	0	0	0.0701032	0	0	0.0482443	0.0283443	0	0.0640014	0	0.123102	0.0380906	0	0	66	MALE	Stage IIIA	T3	N1	MX	III	4
TCGA-56-7580	0.0129983	0	0.00833163	0.00154826	0	0.118864	0.0255804	0.188646	0.0800344	0	0.00939772	0.0210746	0	0.0283008	0.220367	0	0.135666	0	0.0929037	0.0545848	0	0.00170276	84	MALE	Stage IB	T2a	N0	M0	I	3
TCGA-56-A62T	0	0.0129419	0.0100722	0.110541	0	0.0703187	0.0170259	0.413665	0	0.0902311	0.00436092	0	0.147378	0	0.0263372	0	0.076343	0	0.0207853	0	0	0	78	MALE	Stage IIA	T2b	N0	MX	II	2
TCGA-58-8387	0	0.0850012	0	0.0272708	0	0.0414391	0.1055	0.132638	0	0.0256039	0	0	0.0331259	0	0.288992	0.0177013	0.0114223	0	0.128561	0.0641567	0	0.0385876	60	MALE	Stage IIA	T2b	N0	M0	II	4
TCGA-60-2706	0.0102819	0.010519	0	0.0107597	0	0.041601	0.0922382	0.34012	0	0.0741965	0.0357087	0.00538994	0	0.0613875	0.000925916	0.0326664	0.0784512	0	0.122383	0.0675487	0	0.0158229	58	MALE	Stage IA	T1	N0	M0	I	2
TCGA-60-2710	0	0.115602	0.00543369	0.0267228	0	0.137468	0.0624684	0.267453	0	0.0362764	0.0096266	0.00151124	0	0.0167427	0.0723674	0	0.115537	0	0.0796648	0.0162572	0	0.0368696	67	FEMALE	Stage IIA	T1	N1	M0	II	4
TCGA-60-2723	0	0.0128049	0.0105823	0.0349488	0	0	0.066553	0.214051	0.00284261	0.0334051	0.034857	0.00139579	0.0636314	0.0460399	0.0704916	0.0292825	0.106326	0	0.211701	0.0610866	0	0	74	FEMALE	Stage IB	T2	N0	M0	I	4
TCGA-63-5128	0	0.06133	0.0286146	0.0257129	0.0489373	0	0	0.161979	0.196051	0	0.0589531	0.0198268	0	0	0.0623514	0	0.183441	0	0.098632	0.0541709	0	0		MALE	Stage IB	T2	N0	M0	I	4
TCGA-63-A5MG	0	0.155374	0.0279064	0.0235169	0	0.0333761	0.0136471	0.114044	0.0286118	0	0.0166907	0.0164188	0	0.0353069	0.350573	0.0202199	0.0891726	0	0.0544507	0.0206902	0	0	68	MALE	Stage IB	T2	N0	M0	I	3
TCGA-63-A5MH	0.0569559	0	0.000676181	0	0	0.474223	0.0421397	0.00453365	0.133673	0	0	0	0	0.0513202	0	0.00242823	0.135119	0	0.0815122	0.0174187	0	0	68	MALE	Stage IA	T1	N0	M0	I	5
TCGA-66-2727	0	0.0877391	0.00171286	0.0631201	0	0.0307087	0.0971992	0.298798	0.00107727	0.0248285	0.0215118	0.00673272	0.0168605	0.00210786	0.110043	0.00637591	0.0917981	0	0.0895081	0.0498777	0	0	55	FEMALE	Stage IB	T2	N0	M0	I	4
TCGA-66-2766	0	0.187412	0	0	0	0	0.0591247	0.349476	0.0153525	0	0.00637805	0.00467888	0	0.0466678	0.130068	0.0133865	0.0739355	0	0.0897989	0.0132709	0	0.0104511	54	MALE	Stage IIIA	T2	N2	M0	III	4
TCGA-66-2773	0	0.0293293	0.0150778	0.00280976	0	0.03761	0.11029	0.343064	0.0127652	0	0.0663248	0.02201	0	0.0429907	0.00821188	0.0159018	0.0804599	0	0.118085	0.086061	0	0.00900886	69	MALE	Stage IB	T2	N0	M0	I	3
TCGA-66-2778	0	0.116979	0.0182519	0.0567982	0	0.0294239	0.0153519	0.210682	0.0636897	0	0	0.172878	0	0.0112521	0.135538	0	0.0655724	0	0.0575651	0.0162437	0	0.0297739	68	FEMALE	Stage IIIB	T2	N3	M0	III	4
TCGA-68-7756	0	0.165732	0	0.0360399	0	0.180319	0.0263363	0.240092	0.0352862	0.0141107	0	0	0	0	0.164868	0.0175739	0	0	0.0609741	0.0419279	0.00240133	0.0143393	84	MALE	Stage IIIA	T4	N1	MX	III	3
TCGA-77-7463	0	0.0639672	0	0.0582518	0	0.171288	0.0602621	0.225189	0.00430876	0.102246	0.00886713	0.0080491	0.0503661	0	0.0467863	0	0.0782267	0	0.0427521	0.0616151	0	0.0178252	75	MALE	Stage IB	T2	N0	M0	I	4
TCGA-77-8145	0	0.202787	0	0	0	0.246607	0.020647	0.117011	0.0713385	0	0	0.00614055	0	0.0331213	0.158699	0	0.0749883	0	0.0368578	0.0219277	0	0.00987513	73	MALE	Stage IIIB	T4	N1	M0	III	2
TCGA-77-A5G6	0	0.0915967	0.00778678	0.0183849	0	0	0.0251655	0.281598	0	0.142451	0.0458567	0.0116072	0.000332462	0	0.141847	0.00411189	0.0514018	0	0.0968102	0.0746198	0	0.00643014	66	MALE	Stage IIIA	T2	N2	M0	III	2
TCGA-85-7710	0	0.0408361	0.00251919	0.0582599	0	0	0.119027	0.223301	0.0372581	0	0.00808597	0.0178935	0.0362965	0	0.0334474	0.00687762	0.118534	0	0.222639	0.0556546	0	0.0193712	59	FEMALE	Stage IA	T1b	N0	M0	I	2
TCGA-85-7843	0	0.124695	0	0	0	0.214449	0.0480602	0.162635	0.0864306	0	0.00164972	0.0125836	0	0.0257372	0.110005	0	0.100563	0	0.0586728	0.0350437	0	0.0194762	50	MALE	Stage IIA	T2a	N1	M0	II	2
TCGA-85-7950	0.0156295	0.00787397	0.146261	0	0	0.117087	0.0864578	0.132787	0	0.013005	0	0	0.0579884	0	0	0	0.0752614	0	0.169223	0.0971297	0	0.0812957	46	MALE	Stage IB	T2a	N0	M0	I	2
TCGA-85-8052	0.067895	0	0	0	0	0.370209	0.021846	0.295289	0.0129298	0	0	0	0	0.0395667	0.0110045	0	0	0	0.0804506	0.0431591	0	0.0576502	53	MALE	Stage IIB	T3	N0	M0	II	2
TCGA-85-8355	0.0247222	0.106944	0.00905628	0.00328453	0	0.0563404	0.0452668	0.234229	0	0.0338755	0.0291282	0	0	0.0208492	0.0637915	0.0260278	0.14296	0	0.12299	0.0613138	0	0.0192209	63	MALE	Stage IA	T1a	N0	M0	I	1
TCGA-85-8580	0.109944	0.0931651	0.0202538	0	0	0.20259	0.0291902	0.153191	0	0.0135962	0	0	0.0105894	0	0.0145515	0	0.0802717	0	0.097783	0.152753	0	0.0221204	52	FEMALE	Stage IB	T2a	N0	M0	I	4
TCGA-85-A4PA	0.232355	0.283027	0.0139135	0	0	0.0436593	0	0.0582838	0	0	0.00657034	0	0.00247547	0.00705693	0.000733803	0	0.100756	0	0.0661709	0.141638	0	0.0433589	61	MALE	Stage IB	T2a	N0	M0	I	4
TCGA-92-7341	0	0.147873	0.0197673	0	0	0.171566	0.021382	0.274432	0.00104163	0.0185382	0.0066872	0.00465128	0.0138897	0.025626	0.0876861	0	0.170879	0	0.0334306	0	0	0.00255006	71	MALE	Stage IB	T2a	N0	MX	I	2
TCGA-92-8064	0	0.0462763	0.0165868	0	0	0.0094951	0.0827555	0.143027	0	0.0341159	0.00997734	0.00297061	0.0483011	0.0239507	0.0727328	0.0699615	0.070946	0	0.268396	0.0892134	0	0.0112943	58	MALE	[Discrepancy]	T2b	N0	MX	[Discrepancy]	4
TCGA-94-A5I6	0	0.0815938	0.00898995	0.0018294	0	0.301493	0	0.254277	0.0665999	0	0	7.28715e-05	0	0.0103269	0.0466394	0	0.0831788	0.0875167	0.0574827	0	0	0	62	MALE	Stage IIB	T3	N0	M0	II	4
TCGA-96-8170	0	0.14874	0.0228914	0.00932616	0	0.00482501	0.00639623	0.287912	0	0.0267919	0.0474388	0.0213155	0	0.0603042	0.147241	0	0.102526	0	0.0513485	0.049274	0	0.0136691	75	FEMALE	Stage IIA	T1a	N1	M0	II	4
TCGA-98-A538	0	0.161933	0	0.0274696	0	0	0.0790743	0.178989	0.0604228	0	0.015539	0.0179446	0	0.020887	0.20449	0.00623863	0.0540186	0	0.109896	0.0363804	0	0.0267171	67	MALE	Stage IIB	T3	N0	M0	II	4
TCGA-98-A539	0.114587	0	0.0494613	0.0178868	0	0.107623	0.00577622	0.357396	0.0272836	0	0.0550647	0.00796495	0	0.0753525	0.0367037	0	0.0461898	0.0343897	0.0567696	0.00701063	0	0.00054034	63	MALE	Stage IIB	T3	N0	M0	II	2
TCGA-98-A53A	0	0.16087	0	0	0	0	0.0553019	0.113436	0	0.00878433	0.0112548	0	0.0153813	0.016598	0.178987	0.00542764	0.144406	0	0.146079	0.143474	0	0	70	MALE	Stage IB	T2a	N0	M0	I	2
TCGA-98-A53I	0.0507514	0.196751	0	0.00530237	0	0.0752607	0.0931485	0.113551	0	0.0187436	0.0424475	0	0.0242827	0.0441735	0	0	0.0197942	0	0.150291	0.11369	0	0.0518117	64	MALE	Stage IIA	T2a	N1	M0	II	4
TCGA-J1-A4AH	0.161256	0	0.0173167	0	0.0205179	0.138053	0.0174155	0.216397	0	0.0341251	0	0.00537947	0	0.0713242	0.151661	0	0.0133666	0.00553537	0.0524874	0.0398799	0	0.0552852	70	MALE	Stage IIA	T2b	N0	MX	II	4
TCGA-NC-A5HG	0.0712381	0	0.122865	0	0	0	0.0622482	0.269564	0	0.0626422	0.0134313	0.0372493	0.0690289	0	0.0350576	0	0	0	0.138017	0.118659	0	0	59	MALE	Stage IIIA	T2	N2	M0	III	4
TCGA-O2-A52W	0.00652081	0.0331553	0.0427797	0.04331	0	0.0886282	0.0401527	0.318515	0	0.021363	0.0403579	0	0.00637001	0.0220143	0.083118	0	0.0218698	0	0.115229	0.116616	0	0	63	MALE	Stage I	T2	N0	MX	I	4
TCGA-18-3407	0.0137947	0.0449	0.0191753	0.0282425	0	0.0782817	0.0399757	0.258865	0.0860699	0	0.0284343	0.0301294	0	0	0.103892	0.0243608	0	0	0.17288	0.0245779	0	0.0464206	72	MALE	Stage IB	T2	N0	M0	I	3
TCGA-18-3414	0	0.153677	0.0624815	0.018573	0	0	0.0378738	0.21341	0.0314911	0	0	0.110805	0	0.0150798	0.0351393	0.00148373	0.131686	0	0.154664	0.0329994	0	0.000635678	73	MALE	Stage IV	T4	N1	M1	I	4
TCGA-18-3421	0	0.0459319	0.0478596	0.0195318	0	0	0.122744	0.205199	0	0.0584925	0.0214059	0.0127309	0.0106417	0	0.00533758	0.0718848	0	0	0.302927	0.0753136	0	0	65	MALE	Stage IB	T2	N0	M0	I	4
TCGA-18-4083	0	0.106029	0.0020122	0	0	0.0726677	0.0358651	0.159795	0	0.0781223	0	0	0.0186931	0.0119782	0.218211	0.0168127	0.00290656	0	0.173436	0.0583271	0	0.0451432	63	MALE	Stage IIB	T2	N1	M0	II	2
TCGA-21-1082	0	0.0668904	0.0221723	0.00213699	0	0.0617198	0.0450089	0.251036	0.00257394	0.00493315	0.0277478	0.0042484	0	0.0530814	0.109345	0.00152873	0.156519	0	0.114972	0.0578514	0	0.0182349
TCGA-21-5782	0.057725	0.00231937	0.0253292	0.00278139	0	0.152569	0.0151415	0.160224	0.026701	0	0	0.0100823	0	0.0437173	0.171649	0.103388	0	0	0.13672	0.0903508	0	0.00130196	68	FEMALE	Stage IB	T2	N0	M0	I	4
TCGA-22-0940	0	0.16195	0.0031608	0.0374976	0	0	0.0951177	0.14363	0	0.0359307	0.0127044	0.00109689	0.0548075	0.0156478	0.125478	0.0346868	0.109574	0	0.0697977	0.0921063	0	0.00681429	71	MALE	Stage IIA	T1	N1	M0	II	3
TCGA-22-1000	0	0.0980368	0.0155117	0.0606328	0	0.0527718	0.0454995	0.259228	0.0209524	0.00667865	0.0169118	0.00319722	0	0.0260207	0.0922135	0	0.155199	0	0.0885624	0.0276762	0	0.0309066	76	MALE	Stage IB	T2	N0	M0	I	4
TCGA-22-1005	0.0717864	0.00594292	0.00672128	0	0	0.0302269	0.0776356	0.0452448	0	0.0395053	0	0.0125661	0.0371105	0	0.357893	0	0.0649679	0	0.128061	0.0626938	0	0.0596445	63	MALE	Stage IA	T1	N0	M0	I	4
TCGA-22-4605	0.00318386	0.00796837	0	0.0021726	0	0.28792	0.0197436	0.389967	0.0607252	0.0150863	0.025924	0	0	0.0326106	0.0351318	0.00207959	0.0175117	0	0.0425448	0.0381641	0	0.019266	78	FEMALE	Stage IB	T2	N0	M0	I	4
TCGA-33-4532	0.021979	0.00477902	0.086749	0.00527805	0	0	0	0.345464	0.0710701	0	0.0172185	0.0214342	0	0.0124131	0.0691594	0.020564	0.115961	0	0.128502	0.0794289	0	0	68	MALE	Stage IB	T2	N0	M0	I	2
TCGA-33-4566	0	0.036767	0.0211762	0.0118043	0.00493265	0.0789588	0.0985408	0.206625	0	0.0453953	0.0151101	0.00262497	0.103184	0	0.00525393	0.0465212	0.00302029	0	0.21225	0.0602906	0	0.0475444	40	MALE	Stage IB	T2	N0	M0	I	2
TCGA-34-5234	0	0.0369065	0.0514009	0.0701713	0	0	0.0436658	0.293075	0	0.0520527	0.0305841	0.018202	0.0271283	0	0.0400457	0.011077	0.0921411	0	0.137416	0.0696098	0.0234776	0.00304618	71	FEMALE	Stage IA	T1	N0	M0	I	4
TCGA-34-5236	0	0.0988229	0.00473789	0.0357097	0	0.151943	0.0118139	0.263321	0.0368907	0	0.0405361	0.0110579	0.000916335	0	0.0551898	0	0.136584	0	0.0607303	0.0254589	0	0.0662874
TCGA-34-5239	0	0.0611518	0	0.0371177	0	0.0839656	0.123872	0.133662	0	0.0805588	0.0318452	0	0.017343	0.0352381	0.00709975	0.0312373	0.148781	0	0.120876	0.0446256	0	0.0426265
TCGA-43-2581	0	0.084475	0	0.0216709	0	0.22354	0.0343963	0.199667	0.0139899	0.015619	0.0184927	0.0180258	0	0.0549758	0.0906601	0.0031631	0.180495	0	0.0225842	0	0	0.0182459	47	FEMALE	Stage IIIA	T3	N1	M0	III	2
TCGA-43-8118	0	0.00274878	0	0	0	0.216199	0.0218547	0.431697	0	0.0660044	0.0231007	0.0269627	0	0.0316951	0.0302522	0	0.11567	0	0.0317456	0.00206969	0	0	55	FEMALE	Stage IA	T1b	N0	M0	I	2
TCGA-51-6867	0	0.0474732	0.0849326	0	0	0	0.104279	0.253618	1.25848e-05	0.00106565	0.00307787	0.00543062	0.0429691	0	0.0112076	0.0250538	0.0795963	0	0.232734	0.101627	0.00692302	0	72	FEMALE	Stage I	T1	N0	M0	I	4
TCGA-56-7730	0	0.240895	0.0227712	0	0	0.0406719	0.0436783	0.155831	0	0.0728787	0.0321346	0.00651642	0.00417807	0	0.193213	0	0.0934455	0.0175426	0.0762433	0	0	0	73	MALE	Stage IIA	T2b	N0	M0	II	2
TCGA-56-8307	0	0.056462	0.0250618	0	0	0.00587862	0.136443	0.189096	0.00636008	0	0.0584963	0.00192114	0.0360355	0	0.0437761	0	0.184386	0	0.150614	0.0382392	0	0.0672301	55	FEMALE	Stage IIB	T3	N0	M0	II	2
TCGA-56-8308	0	0.111623	0.0263855	0.00596417	0	0.128629	0.0106811	0.257714	0.0609534	0.0197648	0	0	0	0	0.120388	0.00985094	0.0332181	0	0.114486	0.0512629	0	0.0490786	79	MALE	Stage IIB	T3	N0	MX	II	3
TCGA-56-8504	0	0.0755683	0	0	0	0.109916	0.104715	0.337122	0	0.0350856	0.0140873	0.00647388	0.0188611	0.0187724	0.0084037	0	0	0	0.154434	0.069986	0	0.0465746	74	MALE	Stage IB	T2a	N0	MX	I	4
TCGA-56-A4BY	0	0.174464	0.00512355	0	0	0	0.0964902	0.208809	0	0.0529658	0.0173364	0	0	0.0239279	0.190666	0	0.0612969	0	0.102734	0.0661874	0	0	66	MALE	Stage IB	T2a	N0	MX	I	4
TCGA-58-8392	0	0.25837	0	0.0276208	0	0.0677284	0.00674655	0.157314	0.00713955	0.00179399	0.0247245	0.00448411	0.00535631	0.0197479	0.293141	0	0.0409947	0.00923886	0.0667697	0.00882883	0	0	70	MALE	Stage IB	T2a	N0	M0	I	2
TCGA-58-A46L	0	0.0726353	0	0.032075	0	0.0461234	0.123205	0.19144	0	0.0206955	0.011362	0	0.0466024	0.000205239	0.0500598	0.00126549	0.154285	0	0.158681	0.0913642	0	0	73	MALE	Stage IIIA	T2	N2	M0	III	5
TCGA-60-2721	0	0.0628308	0.0108021	0.00589403	0	0	0.0730989	0.222911	0.00191894	0.0263574	0.0392523	8.29081e-05	0.00340439	0.00455633	0.138707	0	0.116176	0	0.227414	0.0333334	0	0.0332605	73	MALE	Stage IB	T2	N0	M0	I	4
TCGA-60-2725	0	0.0866861	0.0127788	0.0138054	0	0.0325368	0.0644133	0.212369	0.00685119	0.00932011	0.050903	0.0251088	0.00290939	0.0213055	0.0652112	0.0157119	0.170943	0	0.142764	0.0663831	0	0	74	MALE	Stage IB	T2	N0	M0	I	3
TCGA-63-A5MT	0	0.0948614	0.045234	0	0	0.173918	0.136471	0.268794	0	0.0218178	0.0121007	0.0211448	0.0107719	0.0171137	0.124613	0	0.0300685	0	0.0111601	0.030756	0	0.00117568	74	MALE	Stage IIB	T3	N0	M0	II	4
TCGA-63-A5MV	0	0.130072	0.0203257	0.0266872	0	0.101894	0.00630433	0.33651	0	0.0274265	0.0271492	0	0.00458616	0	0.140183	0.000554919	0.0552571	0	0.0905801	0.0227684	0	0.00970113	69	MALE	Stage IIA	T2b	N0	M0	II	4
TCGA-63-A5MW	0.0497018	0	0.0233588	0.0375795	0	0.0461013	0.0476019	0.326647	0	0.0325694	0.0317485	0	0.0662831	0	0.0181652	0.0171829	0	0	0.213452	0.0896082	0	0	76	MALE	Stage IB	T2	N0	M0	I	4
TCGA-66-2734	0	0.0499818	0.0506185	0.031614	0	0.0838273	0.0307133	0.322848	0.0126305	0.007057	0	0.233832	0	0.0441763	0.0186313	0	0.0892048	0	0.0149687	0.00989659	0	0	62	FEMALE	Stage IB	T2	N0	M0	I	4
TCGA-66-2737	0	0.125153	0	0.0881713	0	0	0.0604534	0.189682	0.00544367	0.0426186	0.019938	0	0	0	0.132151	0	0.192421	0	0.10662	0.0373473	0	0	72	MALE	Stage IIB	T2	N1	M0	II	3
TCGA-66-2742	0	0.0678157	0.0321104	0.0356559	0	0.0702465	0.0447501	0.15666	0	0.0623114	0.00952376	0.130657	0	0.00203582	0.197094	0	0.00547656	0	0.0904963	0.0684754	0	0.0266906	70	MALE	Stage IV	T2	N1	M1	I	3
TCGA-66-2757	0	0.0229471	0.0190533	0.0117385	0	0	0.092867	0.3238	0	0.00808337	0.0254497	0	0.012771	0.0206855	0.065269	0.00114369	0.0191902	0	0.265646	0.0940188	0	0.0173367	65	FEMALE	Stage IA	T1	N0	M0	I	4
TCGA-66-2770	0	0.0581368	0	0.00702721	0	0.116968	0.0955722	0.22822	0	0.0413646	0.0368788	0	0.0365809	0.0364512	0.0406033	0.0146244	0.0875461	0	0.110802	0.0892239	0	0	79	MALE	Stage IB	T2	N0	M0	I	3
TCGA-66-2777	0	0.0665627	0.00764123	0.0160879	0	0.230705	0.00666684	0.313896	0.0359984	0.0241885	0.0130996	0.0165382	0	0.0496118	0.0483082	0.0349378	0.0376285	0	0.0560499	0.0101133	0	0.0319666	71	MALE	Stage IB	T2	N0	M0	I	4
TCGA-66-2781	0	0.178	0.0442689	0	0	0.0138991	0.00784117	0.0917045	0	0.048944	0.0138503	0.122488	0.0142766	0	0.214358	0.00865656	0.0793957	0	0.0888023	0.0437477	0	0.0297673	67	MALE	Stage IB	T2	N0	M0	I	4
TCGA-66-2783	0.0655245	0	0	0.0354561	0	0	0.0580472	0.232854	0.0102709	0.0152903	0.0741859	0.000507076	0	0.0665744	0.149658	0.00690372	0.143838	0	0.0961481	0.0230712	0	0.0216704	67	MALE	Stage IIIB	T2	N3	M0	III	4
TCGA-66-2785	0.0221826	0.00689419	0	0	0	3.96468e-05	0.111763	0.257462	0.019806	0.00810339	0.00605906	0.0258672	0.024601	0.000894075	0.0117408	0.0030598	0.14698	0	0.195214	0.137251	0	0.0220822	65	MALE	Stage IB	T2	N0	M0	I	4
TCGA-66-2791	0	0.0588098	0	0.0228527	0	0.0416726	0.115447	0.209598	0.0153913	0.0221754	0.00544702	0.00628853	0	0.050192	0.0796597	0.065494	0.0618133	0	0.191204	0.029549	0	0.0244053	66	MALE	Stage IIIB	T2	N3	M0	III	4
TCGA-66-2793	0.0034765	0.00982723	0.0234286	0	0	0.14496	0.0152094	0.256144	0	0.028364	0	0.0175209	0.0237831	0	0.196353	0	0	0.0277805	0.181014	0.0721394	0	0	68	MALE	Stage IIIB	T4	N1	M0	III	4
TCGA-66-2800	0	0.0734324	0.0225435	0.011499	0	0.0873026	0.0287993	0.343267	0.0172033	0.0163564	0.0375871	0.0348197	0	0.015889	0.101458	0	0.165776	0	0.0430642	0.00100336	0	0	70	MALE	Stage IIIB	T4	N0	M0	III	4
TCGA-77-6843	0	0.0485796	0.0588397	0.0220043	0	0	0.00706557	0.493294	0.01467	0.0951957	0.00337373	0	0.0134076	0.0182972	0.011609	0	0.111668	0	0.0775484	0.0244477	0	0	74	MALE	Stage IIA	T1	N1	M0	II	2
TCGA-77-7465	0	0.0807045	0	0.00071998	0	0.131124	0.174821	0.155726	0	0.00346396	0	0.002472	0.0389538	0	0.0349332	0.0635932	0.00969917	0	0.176428	0.0743179	0	0.0530433	58	MALE	Stage IIA	T2a	N1	M0	II	2
TCGA-77-A5FZ	0.113431	0.0870975	0.00893493	0	0	0.0139129	0.011992	0.203412	0.000952532	0.0159489	0.0412816	0.0180025	0.026658	0	0.0550281	0	0.217204	0	0.0907566	0.0611943	0	0.0341931	64	MALE	Stage IIIB	T4	N0	M0	III	4
TCGA-77-A5GB	0	0.0850888	0	0.0148105	0	0.147996	0.0757178	0.203301	0.106829	0	0	0.00792996	0	0.0565113	0.139162	0.0101177	0.0253285	0	0.0855318	0.000879668	0	0.0407954	90	MALE	Stage IB	T2a	NX	M0	I	2
TCGA-85-6561	0	0.0491945	0	0.00959406	0	0.0305751	0.0880173	0.234086	0.00302119	0.0389534	0.0314143	0.0158641	0.00785483	0.0238734	0.0309009	0.00649181	0.233635	0	0.165253	0.0174529	0	0.0138186	66	MALE	Stage IB	T2a	NX	M0	I	4
TCGA-85-8071	0	0.0213365	0.0217904	0.0308159	0	0.00551779	0.0558881	0.0788863	0	0.104858	0.0147568	0	0.107555	0.0786423	0.109549	0	0.00127176	0	0.231523	0.117658	0	0.0199511	52	MALE	Stage IIA	T1a	N1	M0	II	2
TCGA-85-8072	0	0.142529	0.0129771	0.0172123	0	0.0827409	0.0416657	0.299086	0	0.0224961	0.00428203	0	0.039473	0	0.0850086	0	0.0203443	0	0.106454	0.121057	0	0.00467392	60	MALE	Stage IA	T1a	N0	M0	I	2
TCGA-85-8350	0	0.0683986	0	0.0426236	0	0.0910023	0.0276717	0.274491	0	0.0220201	0.0302883	0	0.0383233	0	0.0721562	0	0.0327583	0	0.140706	0.137876	0	0.021685	61	MALE	Stage IA	T1b	N0	M0	I	2
TCGA-85-A4CL	0	0.0378521	0	0.00809326	0	0.0473216	0.10203	0.138237	0.0683686	0	0.0229731	0	0.0606234	0	0.0128868	0.0283122	0	0	0.238074	0.202403	0	0.0328248	65	MALE	Stage IA	T1b	N0	M0	I	2
TCGA-85-A50Z	0	0.0148717	0.0622709	0	0	0.0263036	0.0295853	0.122526	0	0.117388	0	0.223428	0.157344	0	0.0683296	0	0.0322692	0	0.0745717	0.0262664	0	0.0448453	57	MALE	Stage IIA	T2b	N0	M0	II	2
TCGA-85-A510	0	0.143746	0	0.00910813	0	0	0.0718285	0.184258	0.0496816	0	0.0215559	0	0.0893909	0	0.102368	0.00257853	0.0733239	0	0.139328	0.112833	0	0	74	FEMALE	Stage IIB	T2b	N1	M0	II	2
TCGA-94-7033	0	0.191147	0.0934559	0	0	0.0387194	0.0572067	0.0942923	0	0.0432574	0.0193562	0	0.0766842	0	0.127306	0	0	0	0.113338	0.136384	0	0.00885316	73	MALE	Stage IB	T2	N0	MX	I	4
TCGA-98-A53B	0	0.100189	0	0	0	0.196896	0.0600311	0.265221	0	0.0183782	0.0150708	0	0.0148747	0.0322502	0.0385448	0	0.0622334	0	0.115464	0.0804415	0	0.000405734	69	MALE	Stage IB	T2a	N0	M0	I	2
TCGA-NC-A5HH	0	0.0151655	0	0.0103216	0	0.0388072	0.134787	0.166543	0.0265154	0	0	0	0.0336811	0.00126573	0.169155	0	0	0	0.196945	0.206813	0	0	53	MALE	Stage IA	T1	N0	M0	I	2
TCGA-NC-A5HT	0.156046	0	0	0	0	0.127124	0.0714591	0.131842	0	0.0560447	0	0	0.0477136	0.00744836	0.209288	0	0	0.0360223	0.0803808	0.0766312	0	0	69	MALE	Stage IIIA	T3	N1	M0	III	4
